# Supplementary material
Source: publisher figshare collection journal article supplement (https://gsajournals.figshare.com/ndownloader/files/16979147)
Supplement: Supplementary file 1 [file 16979147]

## Sheet: Sheet1
DGRP id	day id	plate id	neighbour	treatment	arena id	distance (cm)	treatment ingestion
383	311	D	1	0	31	670.173	0.993056
383	311	D	1	0	32	525.244	0.993056
383	311	D	1	0	33	727.815	0.993056
383	311	D	1	0	34	535.106	0.993056
383	311	D	1	0	35	596.565	0.993056
383	311	D	1	0	36	526.024	0.993056
383	511	A	1	0	13	529.287	1.125
383	511	A	1	0	14	570.39	1.125
383	511	A	2	0	15	529.242	1.125
383	511	A	2	0	16	626.841	1.125
383	411	C	1	0	13	617.732	1.22917
383	411	C	1	0	14	569.472	1.22917
383	411	C	2	0	15	652.438	1.22917
383	411	C	2	0	16	573.434	1.22917
383	411	C	2	0	17	655.708	1.22917
383	411	C	1	0	18	538.339	1.22917
383	511	A	2	0	17	481.234	0.958333
383	511	A	1	0	18	402.76	0.958333
383	511	A	1	0	19	478.083	0.958333
383	411	C	1	0	19	570.555	1.17361
383	411	C	2	0	20	342.255	1.17361
383	411	C	2	0	21	651.42	1.17361
383	411	C	2	0	22	659.213	1.17361
383	411	C	2	0	23	682.119	1.17361
383	411	C	1	0	24	301.836	1.17361
383	411	C	1	0	25	459.061	1.14583
383	411	C	2	0	26	532.399	1.14583
383	411	C	2	0	27	411.025	1.14583
383	411	C	2	0	28	164.647	1.14583
383	411	C	2	0	29	187.274	1.14583
383	511	A	1	1	25	498.613	0.652778
383	511	A	2	1	26	581.063	0.652778
383	511	A	2	1	27	504.448	0.652778
383	511	A	2	1	28	493.63	0.652778
383	511	A	2	1	29	528.526	0.652778
383	511	A	1	1	30	596.639	0.652778
383	411	C	1	1	31	497.979	0.423611
383	411	C	1	1	32	312.251	0.423611
383	411	C	1	1	33	347.776	0.423611
383	411	C	1	1	34	311.88	0.423611
383	411	C	1	1	35	490.535	0.423611
383	411	C	1	1	36	558.099	0.423611
383	311	E	1	1	1	442.114	0.479167
383	311	E	1	1	2	534.843	0.479167
383	411	D	1	1	1	123.071	0.590278
383	411	D	1	1	2	554.489	0.590278
383	411	D	1	1	3	557.983	0.590278
383	411	D	1	1	4	545.17	0.590278
383	411	D	1	1	5	281.04	0.590278
383	411	D	1	1	6	380.449	0.590278
383	411	D	2	1	10	643.586	0.645833
383	411	D	2	1	11	358.622	0.645833
383	411	D	1	1	12	504.604	0.645833
383	411	D	1	1	7	461.928	0.645833
383	411	D	2	1	8	635.338	0.645833
383	411	D	2	1	9	571.385	0.645833
383	411	D	1	1	13	505.765	0.34375
383	411	D	1	1	14	570.529	0.34375
383	411	D	2	1	15	391.083	0.34375
383	411	D	2	1	16	16.8325	0.34375
385	512	F	1	0	31	703.917	0.473214
385	512	F	1	0	32	712.374	0.473214
385	512	F	1	0	33	655.638	0.473214
385	512	F	1	0	34	680.707	0.473214
385	512	F	1	0	35	731.392	0.473214
385	512	F	1	0	36	607.709	0.473214
385	512	G	1	0	1	358.373	0.830357
385	512	G	1	0	2	498.802	0.830357
385	512	G	1	0	3	438.07	0.830357
385	512	G	1	0	4	454.468	0.830357
385	512	G	1	0	5	442.815	0.830357
385	512	G	1	0	6	453.46	0.830357
385	312	K	1	0	19	429.076	1.16667
385	312	K	2	0	20	305.046	1.16667
385	312	K	2	0	21	256.006	1.16667
385	312	K	2	0	22	327.461	1.16667
385	312	K	2	0	23	422.169	1.16667
385	312	K	1	0	24	174.655	1.16667
385	412	J	1	0	13	412.725	1.18056
385	412	J	1	0	14	549.357	1.18056
385	412	J	2	0	15	438.483	1.18056
385	412	J	2	0	16	702.711	1.18056
385	412	J	2	0	17	625.59	1.18056
385	412	J	1	0	18	494.173	1.18056
385	412	J	1	0	19	483.265	1.23611
385	412	J	2	0	20	600.269	1.23611
385	412	J	2	0	21	679.305	1.23611
385	412	J	2	0	22	629.606	1.23611
385	412	J	2	0	23	552.082	1.23611
385	412	J	1	0	24	565.009	1.23611
385	512	G	2	1	10	678.364	0.41369
385	512	G	2	1	11	434.722	0.41369
385	512	G	1	1	12	466.345	0.41369
385	512	G	1	1	7	479.127	0.41369
385	512	G	2	1	8	478.472	0.41369
385	512	G	2	1	9	292.662	0.41369
385	412	J	1	1	25	253.275	0.722222
385	412	J	2	1	26	507.933	0.722222
385	412	J	2	1	27	399.377	0.722222
385	312	K	1	1	25	270.684	0.847222
385	312	K	2	1	26	240.888	0.847222
385	312	K	2	1	27	251.688	0.847222
385	312	K	2	1	28	69.3836	0.847222
385	312	K	2	1	29	17.9494	0.847222
385	512	G	1	1	13	59.475	0.651786
385	512	G	1	1	14	302.138	0.651786
385	512	G	2	1	15	397.467	0.651786
385	512	G	2	1	16	478.962	0.651786
385	512	G	2	1	17	221.603	0.651786
385	512	G	1	1	18	208.26	0.651786
385	412	J	1	1	31	442.967	0.666667
385	412	J	1	1	32	460.667	0.666667
385	412	J	1	1	33	538.829	0.666667
385	412	J	1	1	34	82.4109	0.666667
385	312	K	1	1	31	318.928	0.666667
385	312	K	1	1	32	295.689	0.666667
385	312	K	1	1	33	350.037	0.666667
386	3011	H	1	0	33	419.486	1.14062
386	3011	H	1	0	34	359.952	1.14062
386	3011	H	1	0	35	417.873	1.14062
386	3011	H	1	0	36	408.037	1.14062
386	2911	I	1	0	31	279.82	1.425
386	2911	I	1	0	32	101.692	1.425
386	2911	I	1	0	33	621.193	1.425
386	2911	I	1	0	34	510.564	1.425
386	2911	I	1	0	35	199.965	1.425
386	112	E	2	0	10	530.064	1.02679
386	112	E	2	0	11	574.249	1.02679
386	112	E	1	0	12	456.679	1.02679
386	112	E	1	0	7	472.299	1.02679
386	112	E	2	0	8	565.918	1.02679
386	112	E	2	0	9	449.173	1.02679
386	3011	I	1	0	1	449.577	0.927083
386	3011	I	1	0	2	641.593	0.927083
386	3011	I	1	0	3	538.194	0.927083
386	3011	I	1	0	4	429.884	0.927083
386	3011	I	1	0	5	288.291	0.927083
386	3011	I	1	0	6	122.81	0.927083
386	112	E	1	0	13	585.312	0.931548
386	112	E	1	0	14	601.741	0.931548
386	112	E	2	0	15	570.647	0.931548
386	3011	I	2	0	10	141.715	0.760417
386	3011	I	2	0	11	408.103	0.760417
386	3011	I	1	0	12	265.44	0.760417
386	3011	I	1	0	7	370.966	0.760417
386	3011	I	2	0	8	55.2253	0.760417
386	3011	I	2	0	9	441.576	0.760417
386	2911	J	1	1	1	492.237	0.364583
386	2911	J	1	1	2	232.091	0.364583
386	2911	J	1	1	3	543.899	0.364583
386	2911	J	1	1	4	463.889	0.364583
386	112	E	2	1	16	683.905	0.241071
386	112	E	2	1	17	506.295	0.241071
386	112	E	1	1	18	530.855	0.241071
386	3011	I	1	1	13	495.017	0.59375
386	3011	I	1	1	14	396.148	0.59375
386	3011	I	2	1	15	499.432	0.59375
386	3011	I	2	1	16	500.241	0.59375
386	3011	I	2	1	17	284.559	0.59375
386	3011	I	1	1	18	177.153	0.59375
386	112	E	1	1	19	579.647	0.3125
386	112	E	2	1	20	634.844	0.3125
386	112	E	2	1	21	641.535	0.3125
386	112	E	2	1	22	693.746	0.3125
386	112	E	2	1	23	552.745	0.3125
386	112	E	1	1	24	551.62	0.3125
386	3011	I	1	1	19	550.68	0.371528
386	3011	I	2	1	20	261.878	0.371528
386	3011	I	2	1	21	210.534	0.371528
386	3011	I	2	1	22	705.305	0.371528
386	3011	I	2	1	23	658.577	0.371528
386	3011	I	1	1	24	599.646	0.371528
386	3011	I	1	1	25	468.084	0.545833
386	3011	I	2	1	26	436.722	0.545833
386	3011	I	2	1	27	600.144	0.545833
386	3011	I	2	1	28	570.67	0.545833
386	3011	I	2	1	29	510.847	0.545833
392	311	E	2	0	10	230.906	1.44167
392	311	E	2	0	11	364.259	1.44167
392	311	E	1	0	7	542.371	1.44167
392	311	E	2	0	8	501.804	1.44167
392	311	E	2	0	9	603.207	1.44167
392	411	D	1	0	19	288.296	1.22917
392	411	D	2	0	20	492.62	1.22917
392	411	D	2	0	21	543.132	1.22917
392	411	D	2	0	22	536.72	1.22917
392	411	D	2	0	23	495.442	1.22917
392	411	D	1	0	24	310.29	1.22917
392	411	E	1	0	1	606.535	1.22917
392	411	E	1	0	2	589.221	1.22917
392	411	E	1	0	3	503.998	1.22917
392	411	E	1	0	4	418.14	1.22917
392	411	E	1	0	5	492.381	1.22917
392	411	E	1	0	6	436.695	1.22917
392	411	D	1	0	25	447.699	0.798611
392	411	D	2	0	26	503.779	0.798611
392	411	D	2	0	27	536.626	0.798611
392	411	D	2	0	28	383.325	0.798611
392	411	D	2	0	29	314.094	0.798611
392	411	D	1	0	30	269.212	0.798611
392	411	E	1	0	7	487.122	1.20139
392	411	D	1	0	31	538.799	1.17361
392	411	D	1	0	32	570.127	1.17361
392	411	D	1	0	33	451.036	1.17361
392	411	D	1	0	34	531.56	1.17361
392	411	D	1	0	35	562.478	1.17361
392	411	F	1	1	1	318.783	0.802083
392	411	F	1	1	2	296.838	0.802083
392	411	E	2	1	10	484.909	0.575
392	411	E	2	1	11	463.078	0.575
392	411	E	2	1	8	497.289	0.575
392	411	E	2	1	9	153.848	0.575
392	411	E	1	1	13	440.816	0.895833
392	411	E	1	1	14	432.69	0.895833
392	411	E	2	1	15	243.246	0.895833
392	411	E	2	1	16	398.569	0.895833
392	411	E	2	1	17	467.54	0.895833
392	411	E	1	1	18	447.707	0.895833
392	411	E	1	1	19	455.396	0.923611
392	411	E	2	1	20	515.755	0.923611
392	411	E	2	1	21	370.399	0.923611
392	411	E	2	1	22	369.676	0.923611
392	411	E	2	1	23	448.098	0.923611
392	411	E	1	1	24	572.329	0.923611
392	411	E	1	1	25	557.418	0.923611
392	411	E	2	1	26	401.976	0.923611
392	411	E	2	1	27	442.002	0.923611
392	411	E	2	1	28	474.143	0.923611
392	411	E	2	1	29	390.813	0.923611
392	411	E	1	1	30	450.439	0.923611
392	411	E	1	1	31	407.337	0.784722
392	411	E	1	1	32	511.997	0.784722
392	411	E	1	1	33	478.215	0.784722
392	411	E	1	1	34	337.841	0.784722
392	411	E	1	1	35	191.964	0.784722
392	411	E	1	1	36	483.058	0.784722
426	411	F	2	0	10	413.309	1.14583
426	411	F	2	0	11	247.798	1.14583
426	411	F	1	0	12	151.797	1.14583
426	411	F	1	0	7	247.208	1.14583
426	411	F	2	0	8	318.541	1.14583
426	411	F	2	0	9	147.263	1.14583
426	311	E	1	0	13	483.067	1.10417
426	311	E	1	0	14	628.997	1.10417
426	311	E	2	0	15	689.194	1.10417
426	311	E	2	0	16	595.764	1.10417
426	311	E	2	0	17	657.825	1.10417
426	311	E	1	0	18	367.721	1.10417
426	311	E	1	0	19	529.446	1.02083
426	311	E	2	0	20	608.347	1.02083
426	311	E	2	0	21	736.606	1.02083
426	311	E	2	0	22	660.802	1.02083
426	311	E	2	0	23	451.095	1.02083
426	311	E	1	0	24	557.144	1.02083
426	311	E	1	0	25	545.635	1.1875
426	311	E	2	0	26	710.765	1.1875
426	311	E	2	0	27	780.173	1.1875
426	311	E	2	0	28	574.583	1.1875
426	311	E	2	0	29	465.967	1.1875
426	311	E	1	0	30	651.23	1.1875
426	311	E	1	0	31	530.4	1.13194
426	311	E	1	0	32	583.81	1.13194
426	311	E	1	0	33	537.326	1.13194
426	311	E	1	0	34	569.837	1.13194
426	311	E	1	0	35	619.198	1.13194
426	311	E	1	0	36	612.066	1.13194
426	311	F	1	1	1	444.156	0.4375
426	311	F	1	1	2	452.57	0.4375
426	311	F	1	1	3	457.844	0.4375
426	311	F	1	1	4	512.794	0.4375
426	311	F	1	1	5	441.505	0.4375
426	311	F	1	1	6	506.76	0.4375
426	411	F	1	1	13	176.928	0.3125
426	411	F	1	1	14	172.463	0.3125
426	411	F	2	1	15	438.746	0.3125
426	411	F	2	1	16	468.275	0.3125
426	411	F	2	1	17	338.224	0.3125
426	411	F	1	1	18	134.762	0.3125
426	311	F	2	1	10	465.275	0.215278
426	311	F	2	1	11	494.292	0.215278
426	311	F	1	1	7	447.985	0.215278
426	311	F	2	1	8	453.476	0.215278
426	311	F	2	1	9	497.73	0.215278
426	411	F	1	1	19	316.804	0.368056
426	411	F	2	1	20	495.351	0.368056
426	411	F	2	1	21	608.026	0.368056
426	411	F	2	1	22	359.709	0.368056
426	411	F	2	1	23	216.069	0.368056
426	411	F	1	1	24	118.69	0.368056
426	311	F	1	1	13	476.286	0.197917
426	311	F	1	1	14	346.969	0.197917
426	311	F	2	1	15	626.759	0.197917
426	311	F	2	1	16	478.772	0.197917
426	411	F	1	1	25	224.859	0.3125
426	411	F	2	1	26	288.56	0.3125
426	411	F	2	1	27	337.636	0.3125
443	311	F	1	0	19	559.641	1.15972
443	311	F	2	0	20	569.677	1.15972
443	311	F	2	0	21	566.678	1.15972
443	311	F	2	0	22	403.157	1.15972
443	311	F	2	0	23	457.308	1.15972
443	311	F	1	0	24	541.955	1.15972
443	311	G	1	0	1	625.426	1.27083
443	311	G	1	0	2	562.691	1.27083
443	311	G	1	0	3	491.249	1.27083
443	311	G	1	0	4	391.466	1.27083
443	311	G	1	0	5	481.776	1.27083
443	311	G	1	0	6	642.661	1.27083
443	311	F	1	0	25	487.265	1.35417
443	311	F	2	0	26	512.494	1.35417
443	311	F	2	0	27	549.316	1.35417
443	311	F	2	0	28	540.354	1.35417
443	311	F	2	0	29	456.81	1.35417
443	311	F	1	0	30	571.626	1.35417
443	311	G	2	0	10	698.256	1.02083
443	311	G	2	0	11	406.486	1.02083
443	311	G	1	0	12	545.782	1.02083
443	311	G	1	0	7	574.288	1.02083
443	311	G	2	0	8	651.592	1.02083
443	311	G	2	0	9	564.608	1.02083
443	311	F	1	0	31	472.132	0.770833
443	311	F	1	0	32	481.101	0.770833
443	311	F	1	0	33	411.056	0.770833
443	311	F	1	0	34	487.669	0.770833
443	311	F	1	0	35	512.187	0.770833
443	311	F	1	0	36	463.074	0.770833
443	311	H	1	1	1	455.105	0.798611
443	311	H	1	1	2	536.097	0.798611
443	311	H	1	1	3	484.323	0.798611
443	311	H	1	1	4	516.349	0.798611
443	311	H	1	1	5	553.146	0.798611
443	311	H	1	1	6	530.079	0.798611
443	311	G	1	1	13	567.696	0.965278
443	311	G	1	1	14	477.26	0.965278
443	311	G	2	1	15	570.691	0.965278
443	311	G	2	1	16	571.259	0.965278
443	311	G	2	1	17	617.018	0.965278
443	311	G	1	1	18	620.92	0.965278
443	311	G	1	1	19	492.297	0.909722
443	311	G	2	1	20	679.692	0.909722
443	311	G	2	1	21	445.325	0.909722
443	311	G	2	1	22	664.469	0.909722
443	311	G	2	1	23	593.897	0.909722
443	311	G	1	1	24	655.903	0.909722
443	311	G	1	1	25	642.085	0.743056
443	311	G	2	1	26	749.588	0.743056
443	311	G	2	1	27	568.922	0.743056
443	311	G	2	1	28	696.429	0.743056
443	311	G	2	1	29	641.126	0.743056
443	311	G	1	1	30	642.799	0.743056
443	311	G	1	1	31	480.313	1.15972
443	311	G	1	1	32	522.562	1.15972
443	311	G	1	1	33	722.771	1.15972
443	311	G	1	1	34	672.783	1.15972
443	311	G	1	1	35	678.863	1.15972
443	311	G	1	1	36	582.569	1.15972
461	511	A	2	0	20	305.187	0.916667
461	511	A	2	0	21	274.311	0.916667
461	211	F	1	0	19	436.406	0.986111
461	211	F	2	0	20	73.3076	0.986111
461	211	F	2	0	21	358.291	0.986111
461	411	G	1	0	1	305.09	0.942708
461	411	G	1	0	2	251.56	0.942708
461	411	G	1	0	3	494.074	0.942708
461	411	G	1	0	4	169.221	0.942708
461	411	G	1	0	5	306.286	0.942708
461	411	G	1	0	6	350.768	0.942708
461	411	G	1	0	7	207.492	0.942708
461	411	G	2	0	8	133.054	0.942708
461	311	H	2	0	10	103.072	1.29167
461	311	H	2	0	11	332.337	1.29167
461	311	H	1	0	7	327.585	1.29167
461	311	H	2	0	8	108.607	1.29167
461	311	H	2	0	9	38.5665	1.29167
461	311	H	1	0	13	398.52	0.965278
461	311	H	1	0	14	346.383	0.965278
461	311	H	2	0	15	377.507	0.965278
461	311	H	2	0	16	263.161	0.965278
461	311	H	2	0	17	245.449	0.965278
461	311	H	1	0	18	377.125	0.965278
461	311	H	1	0	19	461.823	1.02083
461	311	H	2	0	20	361.94	1.02083
461	311	H	2	0	21	37.4981	1.02083
461	311	H	2	0	22	330.52	1.02083
461	311	H	2	0	23	255.861	1.02083
461	311	H	1	0	24	367.405	1.02083
461	411	F	1	1	31	358.059	0.979167
461	411	F	1	1	32	349.136	0.979167
461	411	F	1	1	33	415.955	0.979167
461	411	F	1	1	34	426.529	0.979167
461	411	F	1	1	35	398.798	0.979167
461	411	F	1	1	36	400.336	0.979167
461	311	H	1	1	25	383.199	0.381944
461	311	H	2	1	26	406.595	0.381944
461	311	H	2	1	27	383.91	0.381944
461	311	H	2	1	28	458.341	0.381944
461	311	H	2	1	29	416.471	0.381944
461	311	H	1	1	30	446.871	0.381944
461	311	I	1	1	1	298.359	0.465278
461	311	I	1	1	2	70.8156	0.465278
461	311	I	1	1	3	346.997	0.465278
461	311	I	1	1	4	67.0155	0.465278
461	311	I	1	1	5	205.31	0.465278
461	311	I	1	1	6	325.667	0.465278
461	311	H	1	1	31	562.073	0.409722
461	311	H	1	1	32	508.531	0.409722
461	311	H	1	1	33	302.715	0.409722
461	311	H	1	1	34	357.59	0.409722
461	311	H	1	1	35	401.39	0.409722
461	311	H	1	1	36	322.023	0.409722
461	311	I	2	1	10	377.904	0.576389
461	311	I	2	1	11	269.351	0.576389
461	311	I	1	1	12	345.214	0.576389
461	311	I	1	1	7	315.686	0.576389
461	311	I	2	1	8	264.049	0.576389
461	311	I	2	1	9	426.62	0.576389
491	211	F	1	0	25	554.019	0.739583
491	211	F	2	0	26	380.888	0.739583
491	211	F	2	0	27	231.847	0.739583
491	211	F	2	0	28	497.636	0.739583
491	311	J	1	0	1	278.782	0.9375
491	311	J	1	0	2	301.285	0.9375
491	311	J	1	0	3	233.088	0.9375
491	311	I	1	0	13	479.813	0.965278
491	311	I	1	0	14	447.583	0.965278
491	311	I	2	0	15	502.977	0.965278
491	311	I	2	0	16	527.803	0.965278
491	311	I	2	0	17	481.662	0.965278
491	311	I	1	0	18	334.668	0.965278
491	311	I	1	0	19	417.432	0.909722
491	311	I	2	0	20	547.751	0.909722
491	311	I	2	0	21	501.919	0.909722
491	311	I	2	0	22	392.881	0.909722
491	311	I	2	0	23	518.417	0.909722
491	311	I	1	0	24	470.505	0.909722
491	311	I	1	0	25	411.691	1.04861
491	311	I	2	0	26	596.253	1.04861
491	311	I	2	0	27	500.834	1.04861
491	311	I	2	0	28	520.196	1.04861
491	311	I	2	0	29	571.777	1.04861
491	311	I	1	0	30	573.658	1.04861
491	311	I	1	0	31	533.243	1.15972
491	311	I	1	0	32	560.769	1.15972
491	311	I	1	0	33	566.177	1.15972
491	311	I	1	0	34	542.68	1.15972
491	311	I	1	0	35	553.744	1.15972
491	311	J	2	1	10	91.7469	0.604167
491	311	J	2	1	11	334.694	0.604167
491	311	J	1	1	12	183.369	0.604167
491	311	J	1	1	7	293.725	0.604167
491	311	J	2	1	8	377.187	0.604167
491	311	J	2	1	9	261.387	0.604167
491	311	J	1	1	13	302.687	0.465278
491	311	J	1	1	14	311.05	0.465278
491	311	J	2	1	15	394.344	0.465278
491	311	J	2	1	16	259.659	0.465278
491	311	J	2	1	17	448.105	0.465278
491	311	J	1	1	18	413.992	0.465278
491	311	J	1	1	19	406.082	0.520833
491	311	J	2	1	20	469.178	0.520833
491	311	J	2	1	21	301.474	0.520833
491	311	J	2	1	22	275.533	0.520833
491	311	J	2	1	23	360.376	0.520833
491	311	J	1	1	24	425.568	0.520833
491	311	J	1	1	25	484.931	0.715278
491	311	J	2	1	26	529.562	0.715278
491	311	J	2	1	27	469.549	0.715278
491	311	J	2	1	28	426.522	0.715278
491	311	J	2	1	29	459.845	0.715278
491	311	J	1	1	30	388.152	0.715278
491	311	J	1	1	31	526.954	0.604167
491	311	J	1	1	32	513.414	0.604167
491	311	J	1	1	33	516.722	0.604167
491	311	J	1	1	34	526.052	0.604167
491	311	J	1	1	35	490.206	0.604167
491	311	J	1	1	36	501.188	0.604167
357	2910	A	1	0	19	264.303	0.902778
357	2910	A	2	0	20	195.978	0.902778
357	2810	B	1	0	13	320.472	0.513889
357	2810	B	1	0	14	254.134	0.513889
357	2810	B	2	0	15	249.133	0.513889
357	2810	B	2	0	16	233.691	0.513889
357	2810	B	2	0	17	193.697	0.513889
357	2810	B	1	0	18	250.676	0.513889
357	2610	C	1	0	19	428.65	1.0119
357	2610	C	2	0	20	436.814	1.0119
357	2610	C	2	0	21	519.067	1.0119
357	2610	C	2	0	22	164.76	1.0119
357	2610	C	2	0	23	492.384	1.0119
357	2610	C	1	0	24	62.2046	1.0119
357	2610	C	1	0	25	138.429	1.0119
357	2710	C	2	0	10	400.503	0.375
357	2710	C	2	0	11	310.767	0.375
357	2710	C	1	0	12	347.193	0.375
357	2710	C	1	0	7	279.956	0.375
357	2710	C	2	0	8	385.003	0.375
357	2710	C	2	0	9	392.151	0.375
357	2710	C	1	0	13	203.41	0.652778
357	2710	C	1	0	14	449.506	0.652778
357	2710	C	2	0	15	291.756	0.652778
357	2710	C	2	0	16	373.933	0.652778
357	2710	C	2	0	17	370.459	0.652778
357	2710	C	1	0	18	181.253	0.652778
357	2710	C	1	0	19	404.314	0.694444
357	2710	C	2	0	20	413.516	0.694444
357	2710	C	2	0	21	346.343	0.694444
357	2610	C	2	1	26	498.727	0.321429
357	2610	C	1	1	31	441.327	0.321429
357	2610	C	1	1	32	490.109	0.321429
357	2610	C	1	1	33	617.556	0.321429
357	2610	C	1	1	34	366.886	0.321429
357	2610	C	1	1	35	498.848	0.321429
357	2610	C	1	1	36	509.283	0.321429
357	2610	D	1	1	1	176.811	0.458333
357	2610	D	1	1	2	381.118	0.458333
357	2910	A	2	1	21	240.098	0.236111
357	2910	A	2	1	22	242.451	0.236111
357	2910	A	2	1	23	470.59	0.236111
357	2910	A	1	1	24	237.923	0.236111
357	2910	A	1	1	25	289.511	0.236111
357	2910	A	2	1	26	161.014	0.236111
357	2710	C	1	1	25	360.902	0.180556
357	2710	C	2	1	26	489.994	0.180556
357	2710	C	2	1	27	360.365	0.180556
357	2710	C	2	1	28	409.423	0.180556
357	2710	C	2	1	29	326.864	0.180556
357	2710	C	1	1	30	77.9839	0.180556
357	2910	A	2	1	27	130.129	0.236111
357	2910	A	2	1	28	196.512	0.236111
357	2910	A	2	1	29	405.515	0.236111
357	2710	C	1	1	31	282.501	0.152778
357	2710	C	1	1	32	369.224	0.152778
357	2710	C	1	1	33	297.147	0.152778
357	2710	C	1	1	34	371.875	0.152778
357	2710	C	1	1	35	472.215	0.152778
357	2710	C	1	1	36	386.274	0.152778
492	212	A	2	0	29	96.6662	1.25521
492	212	A	1	0	30	277.067	1.25521
492	212	A	1	0	31	466.731	1.25521
492	212	A	1	0	32	238.42	1.25521
492	312	A	1	0	24	349.687	1.10714
492	312	A	1	0	31	345.566	1.10714
492	312	A	1	0	32	466.834	1.10714
492	312	A	1	0	33	456.359	1.10714
492	312	A	1	0	34	339.235	1.10714
492	312	A	1	0	35	450.839	1.10714
492	312	A	1	0	36	499.35	1.10714
492	412	A	1	0	5	312.565	1.08333
492	112	E	1	0	25	568.778	1.42188
492	112	E	2	0	26	526.827	1.42188
492	112	E	2	0	27	497.503	1.42188
492	112	E	2	0	28	587.538	1.42188
492	2911	I	2	0	10	346.752	1.375
492	2911	I	2	0	11	374.36	1.375
492	2911	I	1	0	12	300.923	1.375
492	3011	I	1	0	31	423.696	0.871528
492	3011	I	1	0	32	466.724	0.871528
492	3011	I	1	0	33	429.143	0.871528
492	3011	I	1	0	34	511.378	0.871528
492	3011	I	1	0	35	454.217	0.871528
492	3011	I	1	0	36	330.65	0.871528
492	2911	J	2	0	10	196.312	1.28472
492	2911	J	2	0	11	438.981	1.28472
492	2911	J	1	0	7	392.675	1.28472
492	2911	J	2	0	8	324.388	1.28472
492	2911	J	2	0	9	403.471	1.28472
492	212	A	1	1	33	361.778	0.130208
492	212	A	1	1	34	282.44	0.130208
492	212	A	1	1	35	490.095	0.130208
492	212	A	1	1	36	76.225	0.130208
492	412	A	1	1	6	335.015	0.138889
492	312	B	1	1	1	162.184	0.180556
492	312	B	1	1	2	412.8	0.180556
492	312	B	1	1	3	59.0813	0.180556
492	312	B	1	1	4	89.8944	0.180556
492	312	B	1	1	5	362.007	0.180556
492	312	B	1	1	6	422.399	0.180556
492	112	D	1	1	5	482.675	0.421875
492	112	D	1	1	6	488.765	0.421875
492	112	D	1	1	7	505.926	0.421875
492	112	D	2	1	8	482.918	0.421875
492	2911	D	2	1	15	424.333	0.239583
492	2911	D	2	1	16	400.013	0.239583
492	2911	D	2	1	17	488.304	0.239583
492	2911	D	1	1	18	351.576	0.239583
492	2911	J	1	1	13	352.3	0.298611
492	2911	J	1	1	14	270.17	0.298611
492	2911	J	2	1	15	505.29	0.298611
492	2911	J	2	1	16	382.958	0.298611
492	2911	J	2	1	17	290.936	0.298611
492	2911	J	1	1	18	255.136	0.298611
492	3011	J	1	1	1	39.1894	0.315972
492	3011	J	1	1	2	216.172	0.315972
492	3011	J	1	1	3	405.681	0.315972
492	3011	J	1	1	4	333.386	0.315972
492	3011	J	1	1	5	213.585	0.315972
508	1212	A	1	0	13	210.249	1.73958
508	1212	A	1	0	14	310.399	1.73958
508	1212	A	2	0	15	237.485	1.73958
508	1212	A	2	0	16	126.549	1.73958
508	1312	C	1	0	14	581.787	1.55
508	1312	C	2	0	15	446.498	1.55
508	1312	C	2	0	16	597.765	1.55
508	1312	C	2	0	17	451.946	1.55
508	1312	C	1	0	18	511.788	1.55
508	1512	F	1	0	12	519.049	1.91667
508	912	H	1	0	13	135.305	1.17361
508	912	H	1	0	14	242.152	1.17361
508	912	H	2	0	15	262.067	1.17361
508	912	H	2	0	16	86.3624	1.17361
508	912	H	2	0	17	181.13	1.17361
508	912	H	1	0	18	386.403	1.17361
508	812	J	2	0	10	218.484	1.25417
508	812	J	2	0	11	511.988	1.25417
508	812	J	1	0	7	172.506	1.25417
508	812	J	2	0	8	249.062	1.25417
508	812	J	2	0	9	443.045	1.25417
508	1112	G	2	0	28	647.87	2.25694
508	1112	G	2	0	29	471.143	2.25694
508	1112	G	1	0	30	325.281	2.25694
508	1112	G	1	0	31	598.217	1.32292
508	1112	G	1	0	32	645.645	1.32292
508	1112	G	1	0	33	344.32	1.32292
508	1112	G	1	0	34	471.591	1.32292
508	1112	G	1	0	35	626.565	1.32292
508	1112	G	1	0	36	488.219	1.32292
508	1012	B	1	1	33	365.937	0.875
508	1012	B	1	1	34	364.699	0.875
508	1012	B	1	1	35	378.213	0.875
508	1012	B	1	1	36	446.509	0.875
508	1312	C	1	1	19	487.562	0.861111
508	1312	C	2	1	20	567.516	0.861111
508	1312	C	2	1	21	515.916	0.861111
508	1312	C	2	1	22	501.901	0.861111
508	1312	C	2	1	23	446.109	0.861111
508	1312	C	1	1	24	315.504	0.861111
508	1412	E	1	1	7	490.702	0.854167
508	1412	E	2	1	8	476.258	0.854167
508	912	H	1	1	19	168.41	1.13194
508	912	H	2	1	20	376.343	1.13194
508	912	H	2	1	21	365.081	1.13194
508	912	H	2	1	22	440.967	1.13194
508	912	H	2	1	23	477.475	1.13194
508	912	H	1	1	24	154.66	1.13194
508	1112	H	1	1	1	441.223	0.934028
508	1112	H	1	1	2	342.472	0.934028
508	1112	H	1	1	3	111.223	0.934028
508	1112	H	1	1	4	514.076	0.934028
508	1112	H	1	1	5	474.752	0.934028
508	1112	H	1	1	6	254.116	0.934028
508	812	J	1	1	13	492.824	1.26736
508	812	J	1	1	14	554.282	1.26736
508	812	J	2	1	15	519.11	1.26736
508	812	J	2	1	16	358.934	1.26736
508	812	J	2	1	17	592.415	1.26736
508	812	J	1	1	18	278.648	1.26736
509	312	L	1	0	1	424.301	1.29167
509	312	L	1	0	2	77.7269	1.29167
509	312	L	1	0	3	361.588	1.29167
509	312	L	1	0	4	362.149	1.29167
509	312	L	1	0	5	265.37	1.29167
509	312	L	1	0	6	412.846	1.29167
509	512	G	1	0	19	135.308	0.806548
509	512	G	2	0	20	571.211	0.806548
509	512	G	2	0	21	447.228	0.806548
509	512	G	2	0	22	576.375	0.806548
509	512	G	2	0	23	520.37	0.806548
509	512	G	1	0	24	564.028	0.806548
509	412	K	1	0	1	105.58	1.29167
509	412	K	1	0	2	32.8543	1.29167
509	412	K	1	0	3	314.211	1.29167
509	412	K	1	0	4	82.4414	1.29167
509	412	K	1	0	5	335.068	1.29167
509	412	K	1	0	6	453.272	1.29167
509	512	G	1	0	25	335.16	0.770833
509	512	G	2	0	26	511.551	0.770833
509	512	G	2	0	27	514.406	0.770833
509	512	G	2	0	28	558.78	0.770833
509	512	G	2	0	29	524.914	0.770833
509	512	G	1	0	30	600.97	0.770833
509	412	K	2	0	10	422.427	1.23611
509	412	K	2	0	11	52.1206	1.23611
509	412	K	1	0	12	346.594	1.23611
509	412	K	1	0	7	195.475	1.23611
509	412	K	2	0	8	25.2854	1.23611
509	412	K	2	0	9	42.6401	1.23611
509	512	G	1	1	31	382.636	0.46131
509	512	G	1	1	32	376.048	0.46131
509	512	G	1	1	33	375.229	0.46131
509	512	G	1	1	34	414.822	0.46131
509	512	G	1	1	35	528.232	0.46131
509	512	G	1	1	36	342.206	0.46131
509	512	H	1	1	1	398.644	0.377976
509	512	H	1	1	2	150.346	0.377976
509	512	H	1	1	3	394.877	0.377976
509	512	H	1	1	4	400.999	0.377976
509	512	H	1	1	5	323.759	0.377976
509	512	H	1	1	6	295.281	0.377976
509	412	K	1	1	13	94.1892	0.527778
509	412	K	1	1	14	24.0676	0.527778
509	412	K	2	1	15	21.7038	0.527778
509	412	K	2	1	16	358.18	0.527778
509	412	K	2	1	17	354.667	0.527778
509	412	K	1	1	18	195.855	0.527778
509	312	L	2	1	10	353.956	0.402778
509	312	L	2	1	11	437.117	0.402778
509	312	L	1	1	12	336.66	0.402778
509	312	L	1	1	7	228.227	0.402778
509	312	L	2	1	8	394.948	0.402778
509	312	L	2	1	9	419.416	0.402778
509	312	L	1	1	13	106.078	0.444444
509	312	L	2	1	15	255.266	0.444444
509	312	L	2	1	16	522.159	0.444444
509	312	L	2	1	17	436.68	0.444444
509	312	L	1	1	18	220.617	0.444444
531	512	F	2	0	10	527.063	1.08036
531	512	F	2	0	11	534.076	1.08036
531	512	F	1	0	12	447.799	1.08036
531	512	F	1	0	6	273.667	1.08036
531	512	F	1	0	7	547.641	1.08036
531	512	F	2	0	8	509.35	1.08036
531	512	F	2	0	9	494.602	1.08036
531	512	E	2	0	10	476.563	1.00893
531	512	E	2	0	9	582.155	1.00893
531	512	F	1	0	1	533.961	1.00893
531	512	F	1	0	2	551.397	1.00893
531	512	F	1	0	3	426.972	1.00893
531	512	F	1	0	4	576.661	1.00893
531	512	F	1	0	5	557.701	1.00893
531	412	K	1	0	19	302.213	1.30556
531	412	K	2	0	20	383.012	1.30556
531	412	K	2	0	21	424.731	1.30556
531	412	K	2	0	22	401.308	1.30556
531	412	K	2	0	23	358.097	1.30556
531	412	K	1	0	24	447.973	1.30556
531	412	K	2	0	26	451.704	1.13889
531	412	K	2	0	27	442.695	1.13889
531	412	K	2	0	28	33.2156	1.13889
531	412	K	2	0	29	428.555	1.13889
531	412	K	1	0	30	411.972	1.13889
531	412	K	1	0	32	447.927	1
531	412	K	1	0	33	465.309	1
531	412	K	1	0	34	387.654	1
531	412	K	1	0	35	478.961	1
531	412	K	1	0	36	388.158	1
531	512	F	1	1	13	495.693	0.580357
531	512	F	1	1	14	572.012	0.580357
531	512	F	2	1	15	493.974	0.580357
531	512	F	2	1	16	603.851	0.580357
531	512	F	2	1	17	613.523	0.580357
531	512	F	1	1	18	387.63	0.580357
531	412	L	1	1	1	499.161	0.583333
531	412	L	1	1	2	413.481	0.583333
531	412	L	1	1	3	354.043	0.583333
531	412	L	1	1	4	472.663	0.583333
531	412	L	1	1	5	199.368	0.583333
531	412	L	1	1	6	157.927	0.583333
531	512	F	1	1	19	569.958	0.485119
531	512	F	2	1	20	571.746	0.485119
531	512	F	2	1	21	672.577	0.485119
531	512	F	2	1	22	545.364	0.485119
531	512	F	2	1	23	562.933	0.485119
531	512	F	1	1	24	536.755	0.485119
531	412	L	2	1	10	373.416	0.472222
531	412	L	2	1	11	493.666	0.472222
531	412	L	1	1	12	302.918	0.472222
531	412	L	1	1	7	471.527	0.472222
531	412	L	2	1	8	465.563	0.472222
531	412	L	2	1	9	350.03	0.472222
531	412	L	1	1	13	288.2	0.555556
531	412	L	1	1	14	414.302	0.555556
531	412	L	2	1	15	363.894	0.555556
531	412	L	2	1	16	61.5811	0.555556
531	412	L	2	1	17	401.178	0.555556
531	412	L	1	1	18	464.135	0.555556
563	511	A	1	0	31	449.569	0.763889
563	511	A	1	0	32	552.148	0.763889
563	511	A	1	0	33	448.592	0.763889
563	511	A	1	0	34	593.995	0.763889
563	511	A	1	0	35	393.189	0.763889
563	511	A	1	0	36	559.573	0.763889
563	511	B	1	0	1	256.184	1.01389
563	511	B	1	0	2	316.078	1.01389
563	511	B	1	0	3	329.523	1.01389
563	511	B	1	0	4	395.187	1.01389
563	511	B	1	0	5	384.721	1.01389
563	511	B	1	0	6	434.948	1.01389
563	411	G	2	0	10	402.388	1.68056
563	411	G	2	0	11	510.23	1.68056
563	411	G	2	0	9	470.266	1.68056
563	611	I	1	0	1	363.136	1.14583
563	611	I	1	0	2	431.249	1.14583
563	611	I	1	0	3	438.555	1.14583
563	611	I	1	0	4	310.265	1.14583
563	611	I	1	0	5	423.008	1.14583
563	611	I	1	0	6	322.842	1.14583
563	711	A	1	0	1	504.384	1.06944
563	711	A	1	0	2	492.117	1.06944
563	711	A	1	0	3	349.903	1.06944
563	711	A	1	0	4	485.644	1.06944
563	711	A	1	0	5	485.552	1.06944
563	711	A	1	0	6	437.622	1.06944
563	711	A	1	0	7	437.832	1.22222
563	711	A	2	0	8	468.015	1.22222
563	711	A	2	0	9	428.219	1.22222
563	611	I	2	1	10	475.68	0.368056
563	611	I	2	1	11	462.611	0.368056
563	611	I	1	1	7	293.296	0.368056
563	611	I	2	1	8	457.989	0.368056
563	611	I	2	1	9	383.53	0.368056
563	711	A	2	1	10	235.436	0.4375
563	511	B	2	1	10	548.195	0.486111
563	511	B	2	1	11	498.646	0.486111
563	511	B	1	1	12	149.724	0.486111
563	511	B	1	1	7	347.842	0.486111
563	511	B	2	1	8	583.766	0.486111
563	511	B	2	1	9	388.861	0.486111
563	711	A	1	1	13	351.039	0.430556
563	711	A	1	1	14	353.454	0.430556
563	711	A	2	1	15	460.456	0.430556
563	711	A	2	1	16	387.755	0.430556
563	711	A	2	1	17	207.457	0.430556
563	711	A	1	1	18	488.289	0.430556
563	511	B	1	1	13	327.24	0.680556
563	511	B	1	1	14	482.392	0.680556
563	511	B	2	1	15	392.173	0.680556
563	511	B	2	1	16	498.29	0.680556
563	511	B	2	1	17	432.562	0.680556
563	511	B	1	1	18	319.802	0.680556
563	711	A	1	1	19	384.774	0.402778
563	711	A	2	1	20	367.309	0.402778
563	711	A	2	1	21	590.271	0.402778
563	711	A	2	1	22	392.842	0.402778
563	711	A	2	1	23	409.011	0.402778
563	711	A	1	1	24	311.966	0.402778
584	1212	A	2	0	11	455.333	1.27083
584	1212	A	1	0	12	440.237	1.27083
584	1012	C	1	0	1	426.366	1.51667
584	1012	C	1	0	2	546.103	1.51667
584	1012	C	1	0	3	655.302	1.51667
584	1012	C	1	0	4	359.119	1.51667
584	1012	C	1	0	5	420.13	1.51667
584	1312	C	1	0	25	539.215	1.43056
584	1312	C	2	0	26	606.786	1.43056
584	1312	C	2	0	27	627.708	1.43056
584	1312	C	2	0	28	480.974	1.43056
584	1312	C	2	0	29	452.563	1.43056
584	1312	C	1	0	30	477.355	1.43056
584	1312	D	1	0	1	553.586	1.54167
584	1312	D	1	0	2	566.74	1.54167
584	1412	E	2	0	10	581.942	1.65278
584	1412	E	2	0	11	590.861	1.65278
584	1412	E	2	0	9	592.64	1.65278
584	1512	F	1	0	7	440.314	1.79167
584	1512	F	2	0	8	544.5	1.79167
584	912	H	1	0	25	595.68	1.72917
584	912	H	2	0	26	577.216	1.72917
584	1112	H	2	0	10	591.369	1.47083
584	1112	H	2	0	11	292.407	1.47083
584	1112	H	1	0	7	529.304	1.47083
584	1112	H	2	0	8	595.662	1.47083
584	1112	H	2	0	9	616.245	1.47083
584	1612	H	1	0	7	535.354	2
584	1612	H	2	0	8	575.403	2
584	1612	H	2	0	9	515.369	2
584	1212	A	1	1	4	616.734	0.375
584	1212	A	1	1	5	479.662	0.375
584	1212	A	1	1	6	513.556	0.375
584	1012	C	2	1	10	526.962	0.229167
584	1012	C	1	1	7	393.801	0.229167
584	1012	C	2	1	8	592.207	0.229167
584	1012	C	2	1	9	730.242	0.229167
584	1312	C	1	1	31	371.251	0.194444
584	1312	C	1	1	32	395.007	0.194444
584	1312	C	1	1	33	320.681	0.194444
584	1312	C	1	1	34	674.922	0.194444
584	1312	C	1	1	35	647.883	0.194444
584	1312	C	1	1	36	627.355	0.194444
584	1412	E	1	1	13	589.859	0.364583
584	1412	E	1	1	14	543.255	0.364583
584	1412	E	2	1	15	555.679	0.364583
584	1412	E	2	1	16	501.089	0.364583
584	1512	F	2	1	10	656.87	0.0555556
584	1512	F	2	1	11	596.406	0.0555556
584	1512	F	2	1	9	567.496	0.0555556
584	1112	H	1	1	13	704.365	0.2375
584	1112	H	1	1	14	643.009	0.2375
584	1112	H	2	1	15	578.193	0.2375
584	1112	H	2	1	16	382.027	0.2375
584	1112	H	2	1	17	657.625	0.2375
584	1612	H	2	1	10	449.634	0
584	1612	H	2	1	11	511.095	0
584	812	J	1	1	19	493.693	0.423611
584	812	J	2	1	20	534.532	0.423611
584	812	J	2	1	21	415.952	0.423611
589	812	A	1	0	19	461.278	0.431548
589	812	A	2	0	20	484.889	0.431548
589	612	B	1	0	13	312.633	1.11111
589	612	B	1	0	14	52.6295	1.11111
589	612	B	2	0	15	396.209	1.11111
589	612	B	2	0	16	413.077	1.11111
589	612	B	2	0	17	495.218	1.11111
589	612	B	1	0	18	540.417	1.11111
589	512	H	2	0	10	489.623	1.2125
589	512	H	1	0	7	494.502	1.2125
589	512	H	2	0	8	498.965	1.2125
589	512	H	2	0	9	574.236	1.2125
589	712	A	1	0	19	310.816	1.07986
589	712	A	2	0	20	256.266	1.07986
589	712	A	2	0	21	51.9685	1.07986
589	712	A	2	0	22	324.155	1.07986
589	712	A	2	0	23	431.798	1.07986
589	712	A	1	0	24	458.727	1.07986
589	712	A	1	0	25	544.11	1.07986
589	712	A	2	0	26	396.221	1.07986
589	712	A	2	0	27	176.511	1.07986
589	712	A	2	0	28	461.734	1.07986
589	712	A	2	0	29	188.708	1.07986
589	712	A	1	0	30	281.014	1.07986
589	712	A	1	0	31	443.896	0.829861
589	712	A	1	0	32	378.529	0.829861
589	712	A	1	0	33	426.178	0.829861
589	712	A	1	0	34	354.459	0.829861
589	712	A	1	0	35	422.109	0.829861
589	712	A	1	0	36	468.514	0.829861
589	812	A	2	1	21	407.71	0.574405
589	812	A	2	1	22	447.85	0.574405
589	812	A	2	1	23	462.745	0.574405
589	812	A	1	1	24	413.397	0.574405
589	512	H	1	1	13	490.025	0.345833
589	512	H	1	1	14	558.659	0.345833
589	512	H	2	1	15	442.247	0.345833
589	512	H	2	1	16	466.779	0.345833
589	512	H	2	1	17	529.896	0.345833
589	612	B	1	1	3	225.241	0.4375
589	612	B	1	1	4	393.946	0.4375
589	612	B	1	1	5	252.445	0.4375
589	612	B	1	1	6	431.403	0.4375
589	712	B	1	1	1	481.29	0.357639
589	712	B	1	1	2	447.411	0.357639
589	712	B	1	1	3	464.083	0.357639
589	712	B	1	1	4	215.552	0.357639
589	712	B	1	1	5	481.734	0.357639
589	712	B	1	1	6	453.84	0.357639
589	612	B	1	1	19	379.013	0.25
589	612	B	2	1	20	491.18	0.25
589	612	B	2	1	21	496.725	0.25
589	612	B	2	1	22	467.16	0.25
589	612	B	2	1	23	455.65	0.25
589	712	B	2	1	10	287.298	0.524306
589	712	B	2	1	11	335.794	0.524306
589	712	B	1	1	12	338.495	0.524306
589	712	B	1	1	7	461.318	0.524306
589	712	B	2	1	8	498.459	0.524306
589	712	B	2	1	9	492.736	0.524306
358	812	C	1	0	25	505.795	0.717262
358	812	C	2	0	26	423.09	0.717262
358	812	C	2	0	27	508.501	0.717262
358	812	C	2	0	28	381.194	0.717262
358	812	C	2	0	29	507.117	0.717262
358	812	C	1	0	30	382.638	0.717262
358	912	C	2	0	10	456.674	0.994048
358	912	C	2	0	11	306.022	0.994048
358	912	C	1	0	12	362.992	0.994048
358	912	C	1	0	7	184.163	0.994048
358	912	C	2	0	8	410.871	0.994048
358	912	C	2	0	9	452.726	0.994048
358	712	G	1	0	25	463.475	1.52917
358	712	G	2	0	26	523.447	1.52917
358	712	G	2	0	27	226.53	1.52917
358	712	G	2	0	28	487.43	1.52917
358	712	G	2	0	29	539.661	1.52917
358	1012	A	1	0	19	471.609	0.821429
358	1012	A	2	0	20	446.944	0.821429
358	1012	A	2	0	21	446.69	0.821429
358	1012	A	2	0	22	523.603	0.821429
358	1012	A	2	0	23	443.182	0.821429
358	1012	A	1	0	24	431.272	0.821429
358	1012	A	1	0	25	433.551	0.892857
358	1012	A	2	0	26	486.227	0.892857
358	1012	A	2	0	27	333.721	0.892857
358	1012	A	2	0	28	445.102	0.892857
358	1012	A	2	0	29	534.074	0.892857
358	1012	A	1	0	30	492.816	0.892857
358	1012	A	1	1	31	536.508	0.321429
358	1012	A	1	1	32	505.988	0.321429
358	1012	A	1	1	33	340.817	0.321429
358	1012	A	1	1	34	451.127	0.321429
358	1012	A	1	1	35	524.728	0.321429
358	1012	A	1	1	36	464.686	0.321429
358	1012	B	1	1	1	448.353	0.297619
358	1012	B	1	1	2	408.426	0.297619
358	1012	B	1	1	3	395.298	0.297619
358	1012	B	1	1	4	454.429	0.297619
358	1012	B	1	1	5	331.574	0.297619
358	1012	B	1	1	6	431.785	0.297619
358	1012	B	1	1	7	391.737	0.297619
358	812	C	1	1	31	451.016	0.455357
358	812	C	1	1	32	470.591	0.455357
358	812	C	1	1	33	413.454	0.455357
358	812	C	1	1	34	365.055	0.455357
358	812	C	1	1	35	451.383	0.455357
358	812	C	1	1	36	331.485	0.455357
358	912	C	1	1	13	439.265	0.279762
358	912	C	1	1	14	450.554	0.279762
358	912	C	2	1	15	208.088	0.279762
358	912	C	2	1	16	297.49	0.279762
358	912	C	2	1	17	372.623	0.279762
358	1112	G	1	1	13	467.507	0.336806
358	1112	G	1	1	14	449.319	0.336806
358	1112	G	2	1	15	424.918	0.336806
358	1112	G	2	1	16	514.007	0.336806
358	1112	G	2	1	17	402.59	0.336806
358	1112	G	1	1	18	193.521	0.336806
703	1012	C	1	0	13	209.002	0.958333
703	1012	C	1	0	14	186.053	0.958333
703	1012	C	2	0	15	271.837	0.958333
703	1012	C	2	0	16	157.037	0.958333
703	1012	C	2	0	17	314.799	0.958333
703	1012	C	1	0	18	215.689	0.958333
703	1112	H	1	0	19	259.251	1.09821
703	1112	H	2	0	20	242.706	1.09821
703	1112	H	2	0	21	281.318	1.09821
703	1112	H	2	0	22	293.822	1.09821
703	1112	H	2	0	23	225.12	1.09821
703	1112	H	1	0	24	334.862	1.09821
703	1012	C	1	0	19	366.314	1.13889
703	1012	C	2	0	20	89.4711	1.13889
703	1012	C	2	0	21	186.64	1.13889
703	1012	C	2	0	22	258.092	1.13889
703	1012	C	2	0	23	157.551	1.13889
703	1012	C	1	0	24	200.405	1.13889
703	1112	H	1	0	25	352.398	1.22569
703	1112	H	2	0	26	193.104	1.22569
703	1112	H	2	0	27	388.655	1.22569
703	1112	H	2	0	28	453.492	1.22569
703	1112	H	2	0	29	191.722	1.22569
703	1112	H	1	0	30	147.927	1.22569
703	1012	C	1	0	25	239.631	1.18056
703	1012	C	2	0	26	346.61	1.18056
703	1012	C	2	0	27	372.822	1.18056
703	1012	C	2	0	28	56.4569	1.18056
703	1012	C	2	0	29	267.304	1.18056
703	1012	C	1	0	30	209.802	1.18056
703	1012	C	1	1	31	171.486	0.472222
703	1012	C	1	1	32	357.174	0.472222
703	1012	C	1	1	33	254.603	0.472222
703	1012	C	1	1	34	272.258	0.472222
703	1012	C	1	1	35	220.071	0.472222
703	1012	C	1	1	36	246.915	0.472222
703	1112	H	1	1	31	249.002	0.419643
703	1112	H	1	1	32	300.928	0.419643
703	1112	H	1	1	33	434.755	0.419643
703	1112	H	1	1	34	200.837	0.419643
703	1112	H	1	1	35	217.84	0.419643
703	1112	H	1	1	36	372.945	0.419643
703	1012	D	1	1	1	412.155	0.5
703	1012	D	1	1	2	353.106	0.5
703	1012	D	1	1	3	361.467	0.5
703	1012	D	1	1	4	362.141	0.5
703	1012	D	1	1	5	442.589	0.5
703	1012	D	1	1	6	406.739	0.5
703	1012	D	2	1	10	392.111	0.444444
703	1012	D	2	1	11	284.695	0.444444
703	1012	D	1	1	12	398.978	0.444444
703	1012	D	1	1	7	550.181	0.444444
703	1012	D	2	1	8	222.777	0.444444
703	1012	D	2	1	9	374.251	0.444444
703	1012	D	1	1	13	456.725	0.472222
703	1012	D	1	1	14	423.297	0.472222
703	1012	D	2	1	15	437.83	0.472222
703	1012	D	2	1	16	256.155	0.472222
703	1012	D	2	1	17	292.106	0.472222
703	1012	D	1	1	18	411.862	0.472222
716	511	B	1	0	19	146.875	1.45
716	511	B	2	0	20	475.843	1.45
716	511	B	2	0	21	538.69	1.45
716	511	B	2	0	22	509.509	1.45
716	511	B	2	0	23	506.428	1.45
716	711	A	1	0	25	480.365	1.22222
716	711	A	2	0	26	404.063	1.22222
716	711	A	2	0	27	533.942	1.22222
716	711	A	2	0	28	477.041	1.22222
716	711	A	2	0	29	535.078	1.22222
716	711	A	1	0	30	514.963	1.22222
716	611	I	1	0	13	171.258	1.17361
716	611	I	2	0	15	475.236	1.17361
716	611	I	2	0	16	347.456	1.17361
716	611	I	2	0	17	466.412	1.17361
716	611	I	1	0	18	277.563	1.17361
716	711	A	1	0	31	496.776	1.25
716	711	A	1	0	32	296.468	1.25
716	611	I	1	0	19	382.097	1.22917
716	611	I	2	0	20	345.016	1.22917
716	611	I	2	0	21	494.381	1.22917
716	611	I	2	0	22	225.525	1.22917
716	611	I	2	0	23	385.808	1.22917
716	611	I	1	0	24	383.921	1.22917
716	611	I	1	0	25	224.044	1.25694
716	611	I	2	0	26	377.317	1.25694
716	611	I	2	0	27	448.106	1.25694
716	611	I	2	0	28	382.356	1.25694
716	611	I	2	0	29	533.396	1.25694
716	611	I	1	0	30	403.258	1.25694
716	711	A	1	1	33	610.546	0.458333
716	711	A	1	1	34	373.977	0.458333
716	711	A	1	1	35	478.502	0.458333
716	711	A	1	1	36	526.57	0.458333
716	511	B	1	1	25	449.216	0.541667
716	511	B	2	1	26	429.072	0.541667
716	511	B	2	1	27	507.215	0.541667
716	511	B	2	1	28	413.091	0.541667
716	511	B	2	1	29	432.388	0.541667
716	511	B	1	1	30	434.632	0.541667
716	711	B	1	1	1	498.749	0.736111
716	711	B	1	1	2	355.981	0.736111
716	711	B	1	1	3	485.705	0.736111
716	711	B	1	1	4	513.687	0.736111
716	711	B	1	1	5	335.904	0.736111
716	711	B	1	1	6	345.834	0.736111
716	611	I	1	1	31	364.339	0.590278
716	611	I	1	1	32	316.549	0.590278
716	611	I	1	1	33	443.838	0.590278
716	611	I	1	1	34	261.98	0.590278
716	611	I	1	1	35	390.904	0.590278
716	611	I	1	1	36	441.755	0.590278
716	611	J	1	1	1	572.69	0.645833
716	611	J	1	1	2	553.424	0.645833
716	611	J	1	1	3	395.31	0.645833
716	611	J	1	1	4	471.756	0.645833
716	611	J	1	1	5	514.279	0.645833
716	611	J	1	1	6	513.795	0.645833
716	611	J	1	1	7	529.367	0.604167
716	611	J	2	1	8	581.865	0.604167
721	112	E	1	0	31	422.344	1.01736
721	112	E	1	0	32	597.464	1.01736
721	112	E	1	0	33	502.806	1.01736
721	112	E	1	0	34	411.719	1.01736
721	112	E	1	0	35	591.367	1.01736
721	112	E	1	0	36	534.499	1.01736
721	2911	J	1	0	19	504.733	1.21528
721	2911	J	2	0	20	320.248	1.21528
721	2911	J	2	0	21	469.043	1.21528
721	2911	J	2	0	22	267.698	1.21528
721	2911	J	2	0	23	522.443	1.21528
721	2911	J	1	0	24	438.292	1.21528
721	3011	J	2	0	10	479.55	0.723214
721	3011	J	2	0	11	492.858	0.723214
721	3011	J	1	0	12	297.334	0.723214
721	3011	J	1	0	7	70.7614	0.723214
721	3011	J	2	0	8	195.672	0.723214
721	3011	J	2	0	9	484.576	0.723214
721	2911	J	1	0	25	273.669	0.9375
721	2911	J	2	0	26	294.446	0.9375
721	2911	J	2	0	27	329.804	0.9375
721	2911	J	2	0	28	265.202	0.9375
721	2911	J	2	0	29	432.841	0.9375
721	2911	J	1	0	30	339.846	0.9375
721	3011	J	1	0	13	57.7956	0.508929
721	3011	J	1	0	14	431.353	0.508929
721	3011	J	2	0	15	411.43	0.508929
721	3011	J	2	0	16	558.895	0.508929
721	3011	J	2	0	17	433.244	0.508929
721	3011	J	1	0	18	436.248	0.508929
721	2911	J	1	0	31	488.5	1.13194
721	2911	J	1	0	32	426.802	1.13194
721	2911	J	1	0	33	363.446	1.13194
721	2911	J	1	0	34	407.608	1.13194
721	2911	J	1	0	35	303.408	1.13194
721	2911	J	1	0	36	628.002	1.13194
721	112	F	1	1	1	367.509	0.503472
721	112	F	1	1	2	596.203	0.503472
721	112	F	1	1	3	486.1	0.503472
721	112	F	1	1	4	440.903	0.503472
721	112	F	1	1	5	363.541	0.503472
721	112	F	1	1	6	503.989	0.503472
721	3011	J	1	1	19	423.958	0.627976
721	3011	J	2	1	20	496.549	0.627976
721	3011	J	2	1	21	486.075	0.627976
721	3011	J	2	1	22	497.868	0.627976
721	3011	J	2	1	23	405.456	0.627976
721	3011	J	1	1	24	192.296	0.627976
721	2911	K	1	1	1	462.273	0.8125
721	2911	K	1	1	2	387.807	0.8125
721	2911	K	1	1	3	461.964	0.8125
721	2911	K	1	1	4	525.265	0.8125
721	2911	K	1	1	5	385.771	0.8125
721	2911	K	1	1	6	100.961	0.8125
721	3011	J	1	1	25	55.3652	0.699405
721	3011	J	2	1	26	458.098	0.699405
721	3011	J	2	1	27	439.043	0.699405
721	3011	J	2	1	28	477.499	0.699405
721	3011	J	2	1	29	350.924	0.699405
721	3011	J	1	1	30	441.87	0.699405
721	2911	K	2	1	10	545.615	0.659722
721	2911	K	2	1	11	537.949	0.659722
721	2911	K	1	1	12	466.975	0.659722
721	2911	K	1	1	7	535.146	0.659722
721	2911	K	2	1	8	553.245	0.659722
721	2911	K	2	1	9	450.089	0.659722
721	3011	J	1	1	31	143.366	0.877976
721	3011	J	1	1	32	320.471	0.877976
721	3011	J	1	1	33	351.262	0.877976
721	3011	J	1	1	34	353.039	0.877976
721	3011	J	1	1	35	351.078	0.877976
721	3011	J	1	1	36	313.35	0.877976
727	412	B	1	0	25	148.739	1.4
727	412	B	2	0	26	262.798	1.4
727	412	B	2	0	27	216.362	1.4
727	412	B	2	0	28	393.294	1.4
727	412	B	2	0	29	272.191	1.4
727	312	D	1	0	19	79.5423	1.26389
727	312	D	2	0	20	258.164	1.26389
727	312	D	2	0	21	351.542	1.26389
727	312	D	2	0	22	278.146	1.26389
727	312	D	2	0	23	262.683	1.26389
727	312	D	1	0	24	196.276	1.26389
727	212	D	1	0	13	34.0167	1.11458
727	212	D	1	0	14	21.8618	1.11458
727	212	D	2	0	15	189.658	1.11458
727	212	D	2	0	16	277.025	1.11458
727	212	D	2	0	17	65.0081	1.11458
727	212	D	1	0	18	151.247	1.11458
727	112	H	2	0	10	145.502	1.10069
727	112	H	2	0	11	167.105	1.10069
727	112	H	1	0	12	360.221	1.10069
727	112	H	1	0	7	294.563	1.10069
727	112	H	2	0	8	284.132	1.10069
727	112	H	2	0	9	252.114	1.10069
727	212	D	1	0	19	74.7857	1.50521
727	212	D	2	0	20	62.5086	1.50521
727	212	D	2	0	21	60.4935	1.50521
727	212	D	2	0	22	150.409	1.50521
727	112	H	1	0	13	14.5796	1.0375
727	112	H	1	0	14	175.628	1.0375
727	112	H	2	0	15	277.306	1.0375
727	112	H	2	0	16	146.896	1.0375
727	112	H	2	0	17	147.27	1.0375
727	412	B	1	1	31	278.106	0.0555556
727	412	B	1	1	32	380.2	0.0555556
727	412	B	1	1	33	259.551	0.0555556
727	412	B	1	1	34	418.283	0.0555556
727	412	B	1	1	35	331.696	0.0555556
727	412	B	1	1	36	20.8806	0.0555556
727	312	D	1	1	25	79.918	0.2
727	312	D	2	1	26	193.951	0.2
727	312	D	2	1	27	479.328	0.2
727	312	D	2	1	28	163.435	0.2
727	312	D	2	1	29	521.137	0.2
727	212	D	1	1	25	341.745	0.128472
727	212	D	2	1	26	110.709	0.128472
727	212	D	2	1	27	55.6703	0.128472
727	212	D	2	1	28	47.8836	0.128472
727	212	D	2	1	29	49.3478	0.128472
727	212	D	1	1	30	274.613	0.128472
727	112	H	1	1	19	127.591	0.309028
727	112	H	2	1	20	75.393	0.309028
727	112	H	2	1	21	358.305	0.309028
727	112	H	2	1	22	335.521	0.309028
727	112	H	2	1	23	281.693	0.309028
727	112	H	1	1	24	338.613	0.309028
727	212	D	1	1	31	90.7175	0.151042
727	212	D	1	1	32	80.5096	0.151042
727	212	D	1	1	33	74.7871	0.151042
727	212	D	1	1	34	62.1405	0.151042
727	112	H	1	1	25	324.829	0.304167
727	112	H	2	1	26	396.644	0.304167
727	112	H	2	1	27	340.526	0.304167
727	112	H	2	1	28	237.697	0.304167
737	711	B	2	0	10	619.629	1.09722
737	711	B	2	0	11	637.869	1.09722
737	711	B	1	0	12	606.124	1.09722
737	711	B	1	0	7	630.365	1.09722
737	711	B	2	0	8	730.915	1.09722
737	711	B	2	0	9	328.85	1.09722
737	611	J	2	0	10	254.922	1.63542
737	611	J	2	0	11	660.063	1.63542
737	611	J	1	0	12	749.115	1.63542
737	611	J	2	0	9	533.927	1.63542
737	711	B	1	0	13	724.714	1.20833
737	711	B	1	0	14	679.877	1.20833
737	711	B	2	0	15	409.099	1.20833
737	711	B	2	0	16	595.811	1.20833
737	711	B	2	0	17	625.459	1.20833
737	711	B	1	0	18	262.89	1.20833
737	611	J	1	0	13	420.052	1.20139
737	611	J	1	0	14	750.741	1.20139
737	611	J	2	0	15	742.072	1.20139
737	611	J	2	0	16	660.754	1.20139
737	611	J	2	0	17	650.071	1.20139
737	611	J	1	0	18	713.52	1.20139
737	711	B	1	0	19	674.159	0.902778
737	711	B	2	0	20	556.679	0.902778
737	611	J	1	0	19	354.846	1.20139
737	611	J	2	0	20	547.035	1.20139
737	611	J	2	0	21	661.295	1.20139
737	611	J	2	0	22	567.847	1.20139
737	611	J	2	0	23	664.492	1.20139
737	611	J	1	0	24	634.355	1.20139
737	511	B	1	1	31	345.76	0.569444
737	511	B	1	1	32	342.469	0.569444
737	511	B	1	1	33	372.266	0.569444
737	511	B	1	1	34	8.69325	0.569444
737	511	B	1	1	35	401.39	0.569444
737	511	B	1	1	36	140.932	0.569444
737	511	C	1	1	1	754.919	0.416667
737	711	B	1	1	25	570.069	0.430556
737	711	B	2	1	26	647.625	0.430556
737	711	B	2	1	27	591.988	0.430556
737	711	B	2	1	28	741.957	0.430556
737	711	B	2	1	29	677.227	0.430556
737	711	B	1	1	30	570.749	0.430556
737	611	J	1	1	25	533.644	0.756944
737	611	J	2	1	26	663.318	0.756944
737	611	J	2	1	27	664.168	0.756944
737	611	J	2	1	28	627.376	0.756944
737	611	J	2	1	29	637.748	0.756944
737	611	J	1	1	30	711.244	0.756944
737	711	B	1	1	31	482.316	0.652778
737	711	B	1	1	32	612.929	0.652778
737	711	B	1	1	33	395.517	0.652778
737	711	B	1	1	34	341.64	0.652778
737	711	B	1	1	35	627.828	0.652778
737	611	J	1	1	31	349.857	0.618056
737	611	J	1	1	32	662.195	0.618056
737	611	J	1	1	33	627.284	0.618056
737	611	J	1	1	34	703.534	0.618056
737	611	J	1	1	35	727.949	0.618056
737	611	J	1	1	36	634.209	0.618056
738	711	B	1	0	36	537.921	1.09722
738	711	C	1	0	1	431.638	1.13889
738	711	C	1	0	2	574.059	1.13889
738	711	C	1	0	3	474.41	1.13889
738	711	C	1	0	4	540.306	1.13889
738	711	C	1	0	5	429.346	1.13889
738	711	C	1	0	6	494.556	1.13889
738	611	K	1	0	1	519.299	1.275
738	611	K	1	0	2	627.778	1.275
738	611	K	1	0	3	701.683	1.275
738	611	K	1	0	4	667.405	1.275
738	611	K	1	0	5	662.488	1.275
738	511	C	2	0	10	520.97	0.958333
738	511	C	2	0	11	168.393	0.958333
738	511	C	1	0	12	422.069	0.958333
738	511	C	1	0	7	491.779	0.958333
738	511	C	2	0	8	520.249	0.958333
738	511	C	2	0	9	528.815	0.958333
738	511	C	1	0	13	617.067	1.19444
738	511	C	1	0	14	619.591	1.19444
738	511	C	2	0	15	635.519	1.19444
738	511	C	2	0	16	534.116	1.19444
738	511	C	2	0	17	538.799	1.19444
738	511	C	1	0	18	427.219	1.19444
738	511	C	1	0	19	414.71	1.29167
738	511	C	2	0	20	557.802	1.29167
738	511	C	2	0	21	409.058	1.29167
738	511	C	2	0	22	577.019	1.29167
738	511	C	2	0	23	530.066	1.29167
738	511	C	1	0	24	505.487	1.29167
738	711	C	2	1	10	607.214	1.02778
738	711	C	2	1	11	596.282	1.02778
738	711	C	1	1	12	572.128	1.02778
738	711	C	1	1	7	491.917	1.02778
738	711	C	2	1	8	482.649	1.02778
738	711	C	2	1	9	557.538	1.02778
738	511	D	1	1	1	459.709	1.31944
738	511	D	1	1	2	483.614	1.31944
738	511	D	1	1	3	410.102	1.31944
738	511	D	1	1	4	504.802	1.31944
738	511	D	1	1	5	364.141	1.31944
738	511	D	1	1	6	476.576	1.31944
738	611	K	2	1	10	652.731	1.28472
738	611	K	2	1	11	431.113	1.28472
738	611	K	1	1	12	510.333	1.28472
738	611	K	1	1	7	545.285	1.28472
738	611	K	2	1	8	591.508	1.28472
738	611	K	2	1	9	630.486	1.28472
738	511	C	1	1	25	470.645	1.31944
738	511	C	2	1	26	484.211	1.31944
738	511	C	2	1	27	600.969	1.31944
738	511	C	2	1	28	447.05	1.31944
738	511	C	2	1	29	513.882	1.31944
738	511	C	1	1	30	368.142	1.31944
738	511	C	1	1	31	360.572	1.30556
738	511	C	1	1	32	390.043	1.30556
738	511	C	1	1	33	548.524	1.30556
738	511	C	1	1	34	537.397	1.30556
738	511	C	1	1	35	479.807	1.30556
738	511	C	1	1	36	486.818	1.30556
748	411	G	1	0	13	516.349	1.20139
748	411	G	1	0	14	578.688	1.20139
748	411	G	2	0	15	640.135	1.20139
748	411	G	2	0	16	482.952	1.20139
748	411	G	2	0	17	612.394	1.20139
748	411	G	1	0	18	590.257	1.20139
748	511	D	2	0	10	671.408	1.19444
748	511	D	2	0	11	487.327	1.19444
748	511	D	1	0	12	568.377	1.19444
748	511	D	1	0	7	517.985	1.19444
748	511	D	2	0	8	566.969	1.19444
748	511	D	2	0	9	496.449	1.19444
748	511	D	1	0	13	367.607	1.06944
748	511	D	1	0	14	407.606	1.06944
748	511	D	2	0	15	382.942	1.06944
748	511	D	2	0	16	450.835	1.06944
748	511	D	2	0	17	583.503	1.06944
748	511	D	1	0	18	473.348	1.06944
748	511	D	1	0	19	528.299	1.31944
748	511	D	2	0	20	436.936	1.31944
748	511	D	2	0	21	517.443	1.31944
748	511	D	2	0	22	533.822	1.31944
748	511	D	2	0	23	641.03	1.31944
748	511	D	1	0	24	478.222	1.31944
748	511	D	1	0	25	245.647	1.11111
748	511	D	2	0	26	499.011	1.11111
748	511	D	2	0	27	583.516	1.11111
748	511	D	2	0	28	603.496	1.11111
748	511	D	2	0	29	549.887	1.11111
748	511	D	1	0	30	587.061	1.11111
748	511	D	1	1	31	460.342	0.180556
748	511	D	1	1	32	607.755	0.180556
748	511	D	1	1	33	595.041	0.180556
748	511	D	1	1	34	632.318	0.180556
748	511	D	1	1	35	551.548	0.180556
748	511	D	1	1	36	646.87	0.180556
748	511	E	1	1	1	193.228	0.347222
748	511	E	1	1	2	136.458	0.347222
748	511	E	1	1	3	352.458	0.347222
748	511	E	1	1	4	588.6	0.347222
748	511	E	1	1	5	373.197	0.347222
748	511	E	1	1	6	515.059	0.347222
748	511	E	2	1	10	602.699	0.347222
748	511	E	2	1	11	679.469	0.347222
748	511	E	1	1	12	249.204	0.347222
748	511	E	1	1	7	131.112	0.347222
748	511	E	2	1	8	341.972	0.347222
748	511	E	2	1	9	513.488	0.347222
748	511	E	1	1	13	484.245	0.319444
748	511	E	1	1	14	347.408	0.319444
748	511	E	2	1	15	360.132	0.319444
748	511	E	2	1	16	427.931	0.319444
748	511	E	2	1	17	566.122	0.319444
748	511	E	1	1	18	310.038	0.319444
748	511	E	1	1	19	214.644	0.319444
748	511	E	2	1	20	249.571	0.319444
748	511	E	2	1	21	271.042	0.319444
748	511	E	2	1	22	537.74	0.319444
748	511	E	2	1	23	609.741	0.319444
748	511	E	1	1	24	286.628	0.319444
748	511	E	1	1	25	269.817	0.236111
748	511	E	2	1	26	519.483	0.236111
748	511	E	2	1	27	590.225	0.236111
748	511	E	2	1	28	747.769	0.236111
748	511	E	2	1	29	589.876	0.236111
757	1312	D	2	0	10	409.947	1.36111
757	1312	D	2	0	11	418.093	1.36111
757	1312	D	1	0	12	168.351	1.36111
757	1312	D	1	0	7	277.868	1.36111
757	1312	D	2	0	8	404.659	1.36111
757	1312	D	2	0	9	184.473	1.36111
757	1112	G	2	0	23	300.923	1.46875
757	1112	G	1	0	24	344.215	1.46875
757	1212	A	1	0	19	67.419	1.35417
757	1212	A	2	0	20	196.156	1.35417
757	1212	A	2	0	21	264.75	1.35417
757	1212	A	2	0	22	26.8976	1.35417
757	1212	A	2	0	23	23.674	1.35417
757	1212	A	1	0	24	220.852	1.35417
757	1112	I	1	0	1	75.1083	1.12847
757	1112	I	1	0	2	188.811	1.12847
757	1112	I	1	0	3	351.999	1.12847
757	1112	I	1	0	4	214.976	1.12847
757	1112	I	1	0	5	168.169	1.12847
757	1112	I	1	0	6	73.5445	1.12847
757	1212	A	1	0	25	211.539	1.34375
757	1212	A	2	0	26	389.474	1.34375
757	1212	A	2	0	27	282.783	1.34375
757	1112	I	2	0	10	113.21	1.01736
757	1112	I	2	0	11	64.9316	1.01736
757	1112	I	1	0	7	110.22	1.01736
757	1112	I	2	0	8	93.1323	1.01736
757	1112	I	2	0	9	97.1245	1.01736
757	1212	A	2	0	28	92.4343	1.22917
757	1212	A	2	0	29	271.335	1.22917
757	1212	A	1	1	31	295.372	0.493056
757	1212	A	1	1	32	257.116	0.493056
757	1212	A	1	1	33	379.145	0.493056
757	1212	A	1	1	34	280.704	0.493056
757	1212	A	1	1	35	324.214	0.493056
757	1212	A	1	1	36	87.4904	0.493056
757	1212	B	1	1	1	313.894	0.520833
757	1212	B	1	1	2	343.885	0.520833
757	1212	B	1	1	3	419.913	0.520833
757	1212	B	1	1	4	208.523	0.520833
757	1212	B	1	1	5	370.932	0.520833
757	1212	B	1	1	6	59.8142	0.520833
757	1012	D	1	1	19	438.343	0.520833
757	1012	D	2	1	20	425.112	0.520833
757	1012	D	2	1	21	501.415	0.520833
757	1012	D	2	1	22	387.776	0.520833
757	1312	D	1	1	13	358.794	0.5
757	1312	D	1	1	14	434.819	0.5
757	1312	D	2	1	15	78.1978	0.5
757	1112	I	1	1	13	327.832	0.392361
757	1112	I	1	1	14	255.234	0.392361
757	1112	I	2	1	15	272.636	0.392361
757	1112	I	2	1	16	371.761	0.392361
757	1112	I	2	1	17	297.686	0.392361
757	1112	I	1	1	19	210.845	0.28125
757	1112	I	2	1	20	359.016	0.28125
757	1112	I	2	1	21	309.13	0.28125
757	1112	I	2	1	22	328.532	0.28125
757	1112	I	2	1	23	367.087	0.28125
757	1112	I	1	1	24	146.45	0.28125
360	2510	A	1	0	13	422.642	0.888889
360	2510	A	1	0	14	143.315	0.888889
360	2510	A	2	0	15	223.607	0.888889
360	2910	A	1	0	30	328.492	0.322917
360	2910	A	1	0	31	257.828	0.322917
360	2910	A	1	0	32	397.073	0.322917
360	2910	A	1	0	33	223.184	0.322917
360	2910	A	1	0	34	370.843	0.322917
360	2910	A	1	0	35	471.45	0.322917
360	2910	A	1	0	36	369.733	0.322917
360	2810	B	1	0	19	377.113	0.883333
360	2810	B	2	0	20	429.322	0.883333
360	2810	B	2	0	21	207.612	0.883333
360	2810	B	2	0	22	365.765	0.883333
360	2810	B	2	0	23	247.546	0.883333
360	2910	B	1	0	1	346.698	0.677083
360	2910	B	1	0	2	277.026	0.677083
360	2910	B	1	0	3	205.972	0.677083
360	2910	B	1	0	4	356.852	0.677083
360	2910	B	1	0	5	281.148	0.677083
360	2910	B	1	0	6	439.519	0.677083
360	2710	D	2	0	10	458.781	1.06944
360	2710	D	2	0	11	549.011	1.06944
360	2710	D	1	0	12	451.917	1.06944
360	2710	D	1	0	7	533.319	1.06944
360	2710	D	2	0	8	536.883	1.06944
360	2710	D	2	0	9	476.665	1.06944
360	2710	D	1	0	13	282.845	1.1875
360	2710	D	1	0	14	511.114	1.1875
360	2710	D	2	0	15	575.759	1.1875
360	2810	B	1	1	25	440.328	0.347222
360	2810	B	2	1	26	477.937	0.347222
360	2810	B	2	1	27	390.911	0.347222
360	2810	B	2	1	28	151.802	0.347222
360	2810	B	2	1	29	635.152	0.347222
360	2810	B	1	1	30	390.536	0.347222
360	2710	D	1	1	19	189.642	0.0972222
360	2710	D	2	1	20	292.828	0.0972222
360	2710	D	2	1	21	563.298	0.0972222
360	2710	D	2	1	22	297.61	0.0972222
360	2710	D	2	1	23	571.399	0.0972222
360	2710	D	1	1	24	584.223	0.0972222
360	2910	B	2	1	10	108.232	0.236111
360	2910	B	2	1	11	172.622	0.236111
360	2910	B	1	1	12	139.457	0.236111
360	2910	B	1	1	7	340.356	0.236111
360	2910	B	2	1	8	130.664	0.236111
360	2910	B	2	1	9	245.739	0.236111
360	2610	D	1	1	13	345.934	0.464286
360	2610	D	1	1	14	321.05	0.464286
360	2610	D	2	1	15	224.268	0.464286
360	2610	D	2	1	16	456.558	0.464286
360	2610	D	2	1	17	226.08	0.464286
360	2610	D	1	1	18	410.783	0.464286
360	2910	B	1	1	13	176.758	0.25
360	2910	B	1	1	14	398.867	0.25
360	2910	B	2	1	15	374.323	0.25
360	2610	D	1	1	19	362.626	0.527778
360	2610	D	2	1	20	151.693	0.527778
360	2610	D	2	1	21	441.107	0.527778
761	512	H	1	0	19	577.362	1.47917
761	512	H	2	0	20	573.357	1.47917
761	512	H	2	0	21	514.264	1.47917
761	512	H	2	0	22	525.815	1.47917
761	512	H	2	0	23	405.021	1.47917
761	612	B	1	0	12	415.436	0.619048
761	612	B	1	0	25	575.597	0.619048
761	612	B	2	0	26	581.472	0.619048
761	612	B	2	0	27	560.923	0.619048
761	612	B	2	0	28	667.632	0.619048
761	612	B	2	0	29	564.852	0.619048
761	712	B	1	0	13	621.3	1.08036
761	712	B	1	0	14	507.38	1.08036
761	712	B	2	0	15	553.505	1.08036
761	712	B	2	0	16	624.224	1.08036
761	712	B	2	0	17	417.963	1.08036
761	712	B	1	0	18	465.727	1.08036
761	612	B	1	0	30	631.322	0.690476
761	612	B	1	0	31	569.23	0.690476
761	612	B	1	0	32	597.2	0.690476
761	612	B	1	0	33	626.32	0.690476
761	612	B	1	0	34	528.81	0.690476
761	612	B	1	0	35	528.087	0.690476
761	612	B	1	0	36	488.236	0.690476
761	712	B	1	0	19	537.936	0.9375
761	712	B	2	0	20	571.72	0.9375
761	712	B	2	0	21	305.186	0.9375
761	712	B	2	0	22	498.357	0.9375
761	712	B	2	0	23	536.737	0.9375
761	712	B	1	0	24	418.375	0.9375
761	812	A	1	1	25	433.635	0.574405
761	512	H	1	1	25	481.733	0.732639
761	512	H	2	1	26	578.107	0.732639
761	512	H	2	1	27	451.822	0.732639
761	512	H	2	1	28	378.807	0.732639
761	512	H	2	1	29	488.534	0.732639
761	712	B	1	1	25	575.854	0.735119
761	712	B	2	1	26	523.465	0.735119
761	712	B	2	1	27	589.28	0.735119
761	712	B	2	1	28	622.257	0.735119
761	712	B	2	1	29	488.404	0.735119
761	712	B	1	1	30	516.151	0.735119
761	612	C	1	1	1	109.062	0.680556
761	612	C	1	1	2	189.517	0.680556
761	612	C	1	1	3	421.251	0.680556
761	612	C	1	1	4	370.783	0.680556
761	612	C	1	1	5	406.334	0.680556
761	712	B	1	1	31	549.39	0.473214
761	712	B	1	1	32	492.3	0.473214
761	712	B	1	1	33	515.713	0.473214
761	712	B	1	1	34	579.385	0.473214
761	712	B	1	1	35	571.051	0.473214
761	712	B	1	1	36	346.98	0.473214
761	612	C	2	1	10	535.948	0.583333
761	612	C	2	1	11	212.969	0.583333
761	612	C	1	1	12	22.9838	0.583333
761	612	C	1	1	6	91.7634	0.583333
761	612	C	1	1	7	417.061	0.583333
761	612	C	2	1	8	495.224	0.583333
761	612	C	2	1	9	476.994	0.583333
776	612	C	1	0	13	318.156	1.19444
776	612	C	1	0	14	409.853	1.19444
776	612	C	2	0	15	427.938	1.19444
776	612	C	2	0	16	260.012	1.19444
776	612	C	2	0	17	356.069	1.19444
776	612	C	1	0	18	239.521	1.19444
776	512	H	1	0	31	356.784	1.20486
776	512	H	1	0	32	386.817	1.20486
776	512	H	1	0	33	412.961	1.20486
776	512	H	1	0	34	311.313	1.20486
776	512	H	1	0	35	363.931	1.20486
776	512	H	1	0	36	315.412	1.20486
776	712	C	1	0	1	65.7746	0.91369
776	712	C	1	0	2	106.172	0.91369
776	712	C	1	0	3	200.08	0.91369
776	712	C	1	0	4	57.7357	0.91369
776	712	C	1	0	5	61.7311	0.91369
776	712	C	1	0	6	163.405	0.91369
776	712	C	2	0	10	144.325	0.96131
776	712	C	2	0	11	139.665	0.96131
776	712	C	1	0	12	96.8242	0.96131
776	712	C	1	0	7	227.33	0.96131
776	712	C	2	0	8	135.065	0.96131
776	712	C	2	0	9	140.536	0.96131
776	712	C	1	0	13	277.22	1.04464
776	712	C	1	0	14	106.608	1.04464
776	712	C	2	0	15	107.53	1.04464
776	712	C	2	0	16	123.213	1.04464
776	712	C	2	0	17	133.888	1.04464
776	712	C	1	0	18	94.2522	1.04464
776	512	I	1	1	1	369.704	0.927083
776	512	I	1	1	2	409.754	0.927083
776	512	I	1	1	3	527.346	0.927083
776	512	I	1	1	4	446.673	0.927083
776	512	I	1	1	5	454.669	0.927083
776	512	I	1	1	6	359.565	0.927083
776	612	C	1	1	19	290.068	0.652778
776	612	C	2	1	20	382.464	0.652778
776	612	C	2	1	21	336.339	0.652778
776	612	C	2	1	22	204.931	0.652778
776	612	C	2	1	23	258.547	0.652778
776	612	C	1	1	24	166.539	0.652778
776	712	C	1	1	19	208.189	0.901786
776	712	C	2	1	20	327.007	0.901786
776	712	C	2	1	21	107.979	0.901786
776	712	C	2	1	22	119.698	0.901786
776	712	C	2	1	23	87.8636	0.901786
776	712	C	1	1	24	163.7	0.901786
776	612	C	1	1	25	311.08	0.819444
776	612	C	2	1	26	402.002	0.819444
776	612	C	2	1	27	241.767	0.819444
776	612	C	2	1	28	345.932	0.819444
776	612	C	2	1	29	368.031	0.819444
776	612	C	1	1	30	255.46	0.819444
776	712	C	1	1	25	239.491	0.854167
776	712	C	2	1	26	263.665	0.854167
776	712	C	2	1	27	166.202	0.854167
776	712	C	2	1	28	49.484	0.854167
776	712	C	2	1	29	87.204	0.854167
776	712	C	1	1	30	120.454	0.854167
783	612	C	1	0	31	402.165	0.666667
783	612	C	1	0	32	453.217	0.666667
783	612	C	1	0	33	433.622	0.666667
783	612	C	1	0	34	531.244	0.666667
783	612	C	1	0	35	411.775	0.666667
783	612	C	1	0	36	449.906	0.666667
783	712	C	1	0	31	329.742	0.758929
783	712	C	1	0	32	497.994	0.758929
783	712	C	1	0	33	280.996	0.758929
783	712	C	1	0	34	254.42	0.758929
783	712	C	1	0	35	191.17	0.758929
783	712	C	1	0	36	213.219	0.758929
783	612	D	1	0	1	195.233	0.619048
783	612	D	1	0	2	434.396	0.619048
783	612	D	1	0	3	460.152	0.619048
783	612	D	1	0	4	436.744	0.619048
783	612	D	1	0	5	420.36	0.619048
783	612	D	1	0	6	426.118	0.619048
783	712	D	1	0	1	485.037	0.949405
783	712	D	1	0	2	361.274	0.949405
783	712	D	1	0	3	406.016	0.949405
783	712	D	1	0	4	429.892	0.949405
783	712	D	1	0	5	436.782	0.949405
783	712	D	1	0	6	390.834	0.949405
783	512	I	2	0	10	451.848	0.927083
783	512	I	2	0	11	485.2	0.927083
783	512	I	1	0	12	414.616	0.927083
783	512	I	1	0	7	505.728	0.927083
783	512	I	2	0	8	525.315	0.927083
783	512	I	2	0	9	491.159	0.927083
783	512	I	1	1	13	401.71	0.621528
783	512	I	1	1	14	529.905	0.621528
783	512	I	2	1	15	518.183	0.621528
783	512	I	2	1	16	563.417	0.621528
783	512	I	2	1	17	350.321	0.621528
783	512	I	1	1	18	426.269	0.621528
783	612	D	2	1	10	508.295	0.654762
783	612	D	2	1	11	421.549	0.654762
783	612	D	1	1	12	145.619	0.654762
783	612	D	1	1	7	424.569	0.654762
783	612	D	2	1	8	381.635	0.654762
783	612	D	2	1	9	341.881	0.654762
783	712	D	2	1	10	417.45	0.616071
783	712	D	2	1	11	429.405	0.616071
783	712	D	1	1	12	403.002	0.616071
783	712	D	1	1	7	464.697	0.616071
783	712	D	2	1	8	262.812	0.616071
783	712	D	2	1	9	303.208	0.616071
783	612	D	1	1	13	490.458	0.535714
783	612	D	1	1	14	359.357	0.535714
783	612	D	2	1	15	531.376	0.535714
783	612	D	2	1	16	510.256	0.535714
783	612	D	2	1	17	517.423	0.535714
783	612	D	1	1	18	395.858	0.535714
783	712	D	1	1	13	349.267	0.794643
783	712	D	1	1	14	450.7	0.794643
783	712	D	2	1	15	488.611	0.794643
783	712	D	2	1	16	385.726	0.794643
783	712	D	2	1	17	543.673	0.794643
783	712	D	1	1	18	458.143	0.794643
796	511	E	1	0	31	348.985	1.26389
796	511	E	1	0	32	296.963	1.26389
796	511	E	1	0	33	402.031	1.26389
796	511	E	1	0	34	402.015	1.26389
796	511	E	1	0	35	248.534	1.26389
796	511	E	1	0	36	372.404	1.26389
796	611	K	1	0	13	550.871	0.618056
796	611	K	1	0	14	686.781	0.618056
796	611	K	2	0	15	463.905	0.618056
796	611	K	2	0	16	760.764	0.618056
796	611	K	2	0	17	408.405	0.618056
796	611	K	1	0	18	616.517	0.618056
796	511	F	1	0	1	318.849	1.27778
796	511	F	1	0	2	569.556	1.27778
796	511	F	1	0	3	566.985	1.27778
796	511	F	1	0	4	270.431	1.27778
796	511	F	1	0	5	501.479	1.27778
796	511	F	1	0	6	527.641	1.27778
796	511	F	2	0	10	639.625	1.26389
796	511	F	2	0	11	568.876	1.26389
796	511	F	1	0	12	639.232	1.26389
796	511	F	1	0	7	541.643	1.26389
796	511	F	2	0	8	552.204	1.26389
796	511	F	2	0	9	635.452	1.26389
796	511	F	1	0	13	575.505	1.19444
796	511	F	1	0	14	575.493	1.19444
796	511	F	2	0	15	583.223	1.19444
796	511	F	2	0	16	698.851	1.19444
796	511	F	2	0	17	609.808	1.19444
796	511	F	1	0	18	477.819	1.19444
796	511	G	1	1	1	643.437	0.65
796	511	G	1	1	2	585.619	0.65
796	511	G	1	1	3	679.217	0.65
796	511	G	1	1	4	642.069	0.65
796	511	G	1	1	5	675.282	0.65
796	511	F	1	1	19	603.006	0.791667
796	511	F	2	1	20	457.696	0.791667
796	511	F	2	1	21	655.045	0.791667
796	511	F	2	1	22	626.006	0.791667
796	511	F	2	1	23	676.072	0.791667
796	511	F	1	1	24	451.714	0.791667
796	611	K	1	1	19	585.086	0.534722
796	611	K	2	1	20	656.849	0.534722
796	611	K	2	1	21	746.511	0.534722
796	611	K	2	1	22	785.411	0.534722
796	611	K	2	1	23	665.539	0.534722
796	611	K	1	1	24	596.928	0.534722
796	511	F	1	1	25	475.863	0.847222
796	511	F	2	1	26	636.501	0.847222
796	511	F	2	1	27	675.016	0.847222
796	511	F	2	1	28	620.475	0.847222
796	511	F	2	1	29	681.114	0.847222
796	511	F	1	1	30	623.267	0.847222
796	611	K	1	1	25	577.336	0.760417
796	511	F	1	1	31	654.817	0.75
796	511	F	1	1	32	622.647	0.75
796	511	F	1	1	33	678.204	0.75
796	511	F	1	1	34	446.003	0.75
796	511	F	1	1	35	605.498	0.75
796	511	F	1	1	36	515.154	0.75
801	611	K	1	0	31	489.8	1.0625
801	611	K	1	0	32	549.287	1.0625
801	611	K	1	0	33	636.757	1.0625
801	611	K	1	0	34	573.404	1.0625
801	611	K	1	0	35	670.743	1.0625
801	611	K	1	0	36	520.235	1.0625
801	711	C	1	0	13	500.902	1.09722
801	711	C	1	0	14	556.079	1.09722
801	711	C	2	0	15	350.544	1.09722
801	711	C	2	0	16	384.383	1.09722
801	711	C	2	0	17	401.284	1.09722
801	711	C	1	0	18	432.074	1.09722
801	511	G	2	0	10	543.704	0.652778
801	511	G	2	0	11	89.2601	0.652778
801	511	G	1	0	7	317.406	0.652778
801	511	G	2	0	8	525.986	0.652778
801	511	G	2	0	9	313.47	0.652778
801	611	L	1	0	1	362.7	1.27083
801	611	L	1	0	2	602.455	1.27083
801	611	L	1	0	3	577.538	1.27083
801	611	L	1	0	4	677.501	1.27083
801	611	L	1	0	5	188.128	1.27083
801	611	L	1	0	6	526.891	1.27083
801	711	C	1	0	19	623.74	1.11111
801	711	C	2	0	20	403.313	1.11111
801	611	L	2	0	10	507.829	1.44167
801	611	L	2	0	11	524.418	1.44167
801	611	L	1	0	7	625.561	1.44167
801	611	L	2	0	8	596.509	1.44167
801	611	L	2	0	9	648.126	1.44167
801	511	G	1	1	13	587.364	0.5625
801	511	G	1	1	14	438.823	0.5625
801	511	G	2	1	15	564.19	0.5625
801	511	G	2	1	16	154.807	0.5625
801	711	C	2	1	21	617.528	0.440476
801	711	C	2	1	22	541.978	0.440476
801	711	C	1	1	30	685.041	0.440476
801	611	L	1	1	13	562.582	0.340278
801	611	L	1	1	14	571.128	0.340278
801	611	L	2	1	15	179.42	0.340278
801	611	L	2	1	16	596.622	0.340278
801	611	L	2	1	17	620.922	0.340278
801	611	L	1	1	18	622.925	0.340278
801	711	C	1	1	25	354.43	0.202381
801	711	C	2	1	26	642	0.202381
801	711	C	2	1	27	473.309	0.202381
801	711	C	2	1	28	187.548	0.202381
801	711	C	2	1	29	506.208	0.202381
801	611	L	1	1	19	244.155	0.3125
801	611	L	2	1	20	530.864	0.3125
801	611	L	2	1	21	572.934	0.3125
801	611	L	2	1	22	705.473	0.3125
801	611	L	2	1	23	516.081	0.3125
801	611	L	1	1	24	584.922	0.3125
801	611	L	1	1	25	443.932	0.506944
801	611	L	2	1	26	660.819	0.506944
801	611	L	2	1	27	534.586	0.506944
801	611	L	2	1	28	672.637	0.506944
801	611	L	2	1	29	572.149	0.506944
801	611	L	1	1	30	721.272	0.506944
802	411	G	1	0	19	257.969	1.14583
802	411	G	2	0	20	508.931	1.14583
802	411	G	2	0	21	604.891	1.14583
802	411	G	2	0	22	552.101	1.14583
802	411	G	2	0	23	633.686	1.14583
802	411	G	1	0	24	739.284	1.14583
802	511	H	1	0	1	674.108	1.23611
802	511	H	1	0	2	616.384	1.23611
802	511	H	1	0	3	578.429	1.23611
802	511	H	1	0	4	551.99	1.23611
802	511	H	1	0	5	161.469	1.23611
802	511	H	1	0	6	187.636	1.23611
802	511	G	1	0	19	560.114	1.25
802	511	G	2	0	20	728.771	1.25
802	511	G	2	0	21	480.535	1.25
802	511	G	2	0	22	554.824	1.25
802	511	G	2	0	23	428.227	1.25
802	511	G	1	0	24	570.824	1.25
802	511	G	1	0	25	634.287	1.26389
802	511	G	2	0	26	592.594	1.26389
802	511	G	2	0	27	579.201	1.26389
802	511	G	2	0	28	550.465	1.26389
802	511	G	2	0	29	675.813	1.26389
802	511	G	1	0	30	561.063	1.26389
802	511	G	1	0	31	612.788	1.29167
802	511	G	1	0	32	532.198	1.29167
802	511	G	1	0	33	467.305	1.29167
802	511	G	1	0	34	715.607	1.29167
802	511	G	1	0	35	526.075	1.29167
802	511	G	1	0	36	697.075	1.29167
802	511	C	1	1	2	751.462	0.416667
802	511	C	1	1	3	552.038	0.416667
802	511	C	1	1	4	615.554	0.416667
802	511	C	1	1	5	558.27	0.416667
802	511	C	1	1	6	541.566	0.416667
802	511	H	2	1	10	480.693	0.541667
802	511	H	2	1	11	613.53	0.541667
802	511	H	1	1	12	557.117	0.541667
802	511	H	1	1	7	357.686	0.541667
802	511	H	2	1	8	472.639	0.541667
802	511	H	2	1	9	121.911	0.541667
802	511	H	1	1	13	618.871	0.625
802	511	H	1	1	14	441.849	0.625
802	511	H	2	1	15	554.886	0.625
802	511	H	2	1	16	538.81	0.625
802	511	H	2	1	17	640.948	0.625
802	511	H	1	1	18	438.779	0.625
802	511	H	1	1	19	575.697	0.458333
802	511	H	2	1	20	439.324	0.458333
802	511	H	2	1	21	534.25	0.458333
802	511	H	2	1	22	658.824	0.458333
802	511	H	2	1	23	658.164	0.458333
802	511	H	1	1	24	575.924	0.458333
802	511	H	1	1	25	558.357	0.402778
802	511	H	2	1	26	597.838	0.402778
802	511	H	2	1	27	708.086	0.402778
802	511	H	2	1	28	519.783	0.402778
802	511	H	2	1	29	731.138	0.402778
802	511	H	1	1	30	615.782	0.402778
802	511	H	1	1	31	475.144	0.458333
805	1411	B	1	0	1	438.633	1.03819
805	1411	B	1	0	2	544.365	1.03819
805	1411	B	1	0	3	607.826	1.03819
805	1411	B	1	0	4	543.541	1.03819
805	1411	B	1	0	5	611.491	1.03819
805	1411	B	1	0	6	433.946	1.03819
805	1311	G	1	0	1	265.929	1.21181
805	1311	G	1	0	2	257.531	1.21181
805	1311	G	1	0	3	250.258	1.21181
805	1311	G	1	0	4	490.58	1.21181
805	1311	G	1	0	5	427.585	1.21181
805	1311	G	1	0	6	344.546	1.21181
805	1511	H	1	0	31	210.608	1.13889
805	1511	H	1	0	32	307.43	1.13889
805	1511	H	1	0	33	322.207	1.13889
805	1511	H	1	0	34	462.175	1.13889
805	1511	H	1	0	35	356.449	1.13889
805	1511	H	1	0	36	339.414	1.13889
805	1511	I	1	0	1	328.587	1.23333
805	1511	I	1	0	2	113.555	1.23333
805	1511	I	1	0	3	379.273	1.23333
805	1511	I	1	0	4	147.699	1.23333
805	1511	I	1	0	5	39.2522	1.23333
805	1611	A	1	0	1	588.089	0.958333
805	1611	A	1	0	2	259.102	0.958333
805	1611	A	1	0	3	340.966	0.958333
805	1611	A	1	0	4	209.367	0.958333
805	1611	A	1	0	5	480.45	0.958333
805	1611	A	1	0	6	410.269	1.01389
805	1611	A	1	0	7	473.764	1.01389
805	1411	A	1	1	35	536.967	0.447917
805	1411	A	1	1	36	214.018	0.447917
805	1411	B	2	1	10	303.511	0.454861
805	1411	B	2	1	11	139.866	0.454861
805	1411	B	1	1	12	233.533	0.454861
805	1411	B	1	1	7	363.281	0.454861
805	1411	B	2	1	8	367.123	0.454861
805	1411	B	2	1	9	303.183	0.454861
805	1611	A	2	1	10	525.452	0.486111
805	1611	A	2	1	11	415.707	0.486111
805	1611	A	2	1	8	642.209	0.486111
805	1611	A	2	1	9	477.189	0.486111
805	1511	I	2	1	10	22.9129	0.597222
805	1511	I	2	1	11	353.858	0.597222
805	1511	I	1	1	12	302.102	0.597222
805	1511	I	1	1	7	450.453	0.597222
805	1511	I	2	1	8	301.213	0.597222
805	1511	I	2	1	9	218.616	0.597222
805	1611	A	1	1	13	264.816	0.541667
805	1611	A	1	1	14	366.721	0.541667
805	1611	A	2	1	15	562.129	0.541667
805	1611	A	2	1	16	464.796	0.541667
805	1611	A	2	1	17	67.7865	0.541667
805	1611	A	1	1	18	570.363	0.541667
805	1511	I	1	1	13	423.276	0.472222
805	1511	I	1	1	14	149.1	0.472222
805	1511	I	2	1	15	385.663	0.472222
805	1511	I	2	1	16	466.08	0.472222
805	1511	I	2	1	17	327.662	0.472222
805	1511	I	1	1	18	303.412	0.472222
362	2510	A	1	0	19	436.44	1.16667
362	2510	A	2	0	20	439.608	1.16667
362	3010	A	1	0	31	366.604	0.965278
362	3010	A	1	0	32	560.993	0.965278
362	3010	A	1	0	33	476.351	0.965278
[truncated: 8,332 more rows]
